# Supplementary material for: Re-Exploring the Ability of Common Docking Programs to Correctly Reproduce the Binding Modes of Non-Covalent Inhibitors of SARS-CoV-2 Protease Mpro
Source: Pharmaceuticals (Basel). 2022 Jan 31;15(2):180. doi: 10.3390/ph15020180 (PMC8878732; doi:10.3390/ph15020180)
Supplement: Supplementary file 1 [file pharmaceuticals-15-00180-s001.zip]

Archive with 5 entries (5 files):
- pharmaceuticals-1563251-suppl/MD_data.csv
- pharmaceuticals-1563251-suppl/Selfdocking_scenario1.csv
- pharmaceuticals-1563251-suppl/Selfdocking_scenario2.csv
- pharmaceuticals-1563251-suppl/Supplementary_material.pdf
- pharmaceuticals-1563251-suppl/Video_S1.mp4
