# Supplementary material for: Re-Exploring the Ability of Common Docking Programs to Correctly Reproduce the Binding Modes of Non-Covalent Inhibitors of SARS-CoV-2 Protease Mpro
Source: Pharmaceuticals (Basel). 2022 Jan 31;15(2):180. doi: 10.3390/ph15020180 (PMC8878732; doi:10.3390/ph15020180)
Supplement: Supplementary file 1 [file pharmaceuticals-15-00180-s001.zip › pharmaceuticals-1563251-suppl/MD_data.csv]

Complex	RMSD_final	RMSF_average
5R7Y-JFM	8.18	4.82
5R7Z-HWH	1.36	1.22
5R80-RZG	8.12	2.87
5R81-RZJ	2.6	1.3
5R82-RZS	5.95	3.97
5R83-K0G	2.71	1.28
5R84-GWS	2.93	1.31
5RE4-SZY	1.71	1.21
5RE9-LPZ	8.07	3.59
5REB-T0Y	24.15	8.49
5REH-AWP	6.99	2.18
5REZ-T54	4.44	1.78
5RF1-T5G	3.56	1.57
5RF2-HVB	50.05	22.04
5RF3-T5V	3.02	1.42
5RF6-NTG	6.49	2.8
5RF7-T67	2.51	1.43
5RFE-JGG	6.89	2.26
5RG1-T9J	2.24	1.07
5RGH-U0M	22.82	14.64
5RGI-U0P	1.31	0.99
5RGK-U0V	5.46	2.36
5RGU-UGD	1.88	0.95
5RGV-UGG	2.01	1.14
5RGW-UGM	1.58	0.86
5RGX-UGP	0.99	0.82
5RGY-UGS	2.44	1.62
5RGZ-UH1	1.39	0.85
5RH0-UH4	1.95	1.42
5RH1-UGV	3.38	1.4
5RH2-UH7	2.04	1.05
5RH3-UHA	1.33	0.82
5RH8-UHM	5.93	2.51
5RHD-US7	2.68	1.61
6M2N-3WL	2.55	1.37
6W63-X77	1.82	1.28
6W79-X77	2.12	1.17
7A1U-FUA	5.76	2.69
7ANS-RNW	2.97	1.6
7AP6-RQN	1.86	1.16
7AQE-RV5	7.53	3.25
7AVD-S1W	5.79	2.51
7AWU-S8B	4.55	2.84
7B83-PK8	15.07	9.95
7CA8-FNO	2.73	1.63
7JU7-G65	3.75	1.58
7KX5-X7V	1.65	1.2
7L0D-0EN	3.92	1.85
7L10-XEY	1.51	0.81
7L11-XF1	1.75	1.03
7L12-XF4	2.07	1.13
7L13-XF7	1.64	1.03
7L14-XFD	1.47	0.95
7L5D-XNJ	2.96	1.4
7LDL-XV4	1.06	0.81
7LFE-XWS	1.59	0.98
7LMD-Y6A	1.8	1.05
7LME-Y6J	2.11	1.23
7LMF-Y6G	2.16	1.09
7LTJ-YD1	3.02	1.26
7M8M-YSG	1.38	0.92
7M8N-YSG	1.67	0.98
7M8O-YSM	2.67	1.3
7M8P-YSJ	2.54	1.09
7M8X-YTJ	1.72	1.05
7M8Y-YTM	1.83	1.19
7M8Z-YTV	1.59	1.08
7M90-YTS	1.03	0.79
7M91-YU4	1.89	0.86
7MPB-ASC	12.39	4.7
7N44-06I	1.57	0.97
7N8C-YD1	2.86	1.18
7NT3-UQZ	4.08	0.95
7NUK-USH	3.39	1.46
7P51-5P9	1.72	0.96
7S3K-Z26	1.51	1.07
7S3S-860	1.09	0.95
7S4B-87H	6.24	2.84
5RE5-T0J	2.5	1.39
5RE6-O0S	5.43	5.05
5RE7-T0S	20.71	12.49
5RE8-T0V	28.2	19.71
5REA-JGP	13.29	5.95
5REC-T1J	19.11	9.43
5RED-JJG	33.97	32.78
5REE-T1M	16.46	12.75
5REF-6SU	10.28	4.25
5REG-LWA	2.64	1.56
5REI-T1S	4.29	2.37
5RF0-T5D	3.88	2.59
5RF4-T5Y	38.35	28.44
5RF5-HV2	36.99	23.1
5RF8-SFY	30.19	17.11
5RF9-S7D	16.3	12.55
5RFA-JGY	5.42	4.38
5RFB-K3S	26.6	18.99
5RFC-K1Y	5.01	3.16
5RFD-T6J	30.33	37.02
5RGG-NZD	5.54	2.89
5RGJ-U0S	15.55	8.77
5RGQ-U1V	3.36	1.42
5RGS-S7V	22.14	8.18
5RH4-UHG	3.36	2.55
6YVF-A82	5.15	2.96
7ABU-R6Q	5.67	3.2
7AF0-R9W	6.26	2.98
7AGA-LZE	4.99	1.98
7AMJ-RMZ	27.05	16.91
7AOL-RQH	16.36	7.71
7AQI-QEL	5.11	3.47
7AWR-S7W	31.12	13.45
7AWW-CLU	10.23	6.12
7AXM-93J	3.4	2.19
7AXO-QCP	2.99	1.59
7KVL-X4P	29.83	19.39
7KVR-X4V	71.91	44.88
7KW5-X4Y	55.02	20.2
7LDX-R9V	46.59	30.06
7LFP-XY4	1.94	1.07
