# Supplementary material for: Re-Exploring the Ability of Common Docking Programs to Correctly Reproduce the Binding Modes of Non-Covalent Inhibitors of SARS-CoV-2 Protease Mpro
Source: Pharmaceuticals (Basel). 2022 Jan 31;15(2):180. doi: 10.3390/ph15020180 (PMC8878732; doi:10.3390/ph15020180)
Supplement: Supplementary file 1 [file pharmaceuticals-15-00180-s001.zip › pharmaceuticals-1563251-suppl/Selfdocking_scenario1.csv]

Complex	scoring_function	RMSD_sorted	RMSD_scor_func	RMSD_average
5RGI-U0P	GOLD-asp	0.65	0.65	4.05
7LDL-XV4	GOLD-asp	5.39	9.01	7.73
5RH4-UHG	GOLD-asp	5.87	6.27	6.34
7A1U-FUA	GOLD-asp	6.44	8.79	7.74
7L10-XEY	GOLD-asp	0.45	0.45	2.16
5RGH-U0M	GOLD-asp	1.59	5.59	4.08
7AQI-QEL	GOLD-asp	8.80	11.11	9.90
7L14-XFD	GOLD-asp	0.69	0.69	6.20
5RFB-K3S	GOLD-asp	12.28	12.51	12.40
7LFP-XY4	GOLD-asp	1.36	1.37	1.48
5RFD-T6J	GOLD-asp	12.22	13.83	12.71
7AQE-RV5	GOLD-asp	3.08	3.26	3.25
5RF5-HV2	GOLD-asp	2.37	8.25	6.18
7P51-5P9	GOLD-asp	6.91	7.26	7.22
7KVR-X4V	GOLD-asp	10.86	12.51	12.19
7AVD-S1W	GOLD-asp	6.81	7.48	7.19
5RGU-UGD	GOLD-asp	0.94	1.37	3.84
5R7Y-JFM	GOLD-asp	3.20	5.62	5.21
7S3K-Z26	GOLD-asp	0.60	0.60	3.91
7S3S-860	GOLD-asp	0.29	0.29	0.50
5REC-T1J	GOLD-asp	7.53	12.16	10.05
7MPB-ASC	GOLD-asp	3.41	3.76	3.75
7ABU-R6Q	GOLD-asp	1.47	3.73	3.23
7AP6-RQN	GOLD-asp	3.02	3.81	3.54
7N44-06I	GOLD-asp	6.16	6.75	7.30
7AWR-S7W	GOLD-asp	6.14	7.28	6.71
7LMF-Y6G	GOLD-asp	0.69	0.69	3.05
6W79-X77	GOLD-asp	1.22	1.22	4.06
5RHD-US7	GOLD-asp	0.30	0.97	0.87
5REA-JGP	GOLD-asp	9.83	9.83	12.24
5RH8-UHM	GOLD-asp	0.99	6.63	5.44
5RF0-T5D	GOLD-asp	6.52	8.88	8.22
5R82-RZS	GOLD-asp	3.84	4.45	4.42
7AF0-R9W	GOLD-asp	10.54	10.59	10.91
6YVF-A82	GOLD-asp	1.77	12.80	10.54
5RG1-T9J	GOLD-asp	6.07	6.64	6.50
5REB-T0Y	GOLD-asp	1.73	1.73	1.84
5RF3-T5V	GOLD-asp	0.82	0.99	0.93
7M8X-YTJ	GOLD-asp	1.76	1.99	3.80
6M2N-3WL	GOLD-asp	0.66	0.66	3.45
5RGG-NZD	GOLD-asp	3.80	12.16	8.54
5REE-T1M	GOLD-asp	7.32	12.98	9.91
5RE6-O0S	GOLD-asp	5.83	6.26	6.38
5RGJ-U0S	GOLD-asp	5.87	13.10	8.56
5RGY-UGS	GOLD-asp	8.44	8.44	9.09
7KVL-X4P	GOLD-asp	7.56	12.04	8.58
7M8Z-YTV	GOLD-asp	1.19	1.28	4.42
7L12-XF4	GOLD-asp	5.99	7.80	7.14
5RFA-JGY	GOLD-asp	7.74	9.17	9.11
5RFC-K1Y	GOLD-asp	7.19	8.78	8.55
5RE8-T0V	GOLD-asp	11.53	13.90	13.07
5REF-6SU	GOLD-asp	4.34	5.57	5.64
5RE7-T0S	GOLD-asp	3.37	7.79	6.93
7B83-PK8	GOLD-asp	4.75	4.75	5.19
5RGV-UGG	GOLD-asp	0.62	0.62	4.47
5RF9-S7D	GOLD-asp	9.06	9.15	9.62
5RF8-SFY	GOLD-asp	8.40	8.40	8.70
5RED-JJG	GOLD-asp	6.81	7.72	7.36
5RFE-JGG	GOLD-asp	4.26	5.39	4.60
5RE4-SZY	GOLD-asp	0.57	0.57	3.80
5R83-K0G	GOLD-asp	1.02	1.02	3.44
5R80-RZG	GOLD-asp	6.53	6.54	6.68
5REZ-T54	GOLD-asp	1.57	1.57	2.68
7KW5-X4Y	GOLD-asp	8.07	8.39	9.51
7L0D-0EN	GOLD-asp	1.28	1.28	4.69
7AXO-QCP	GOLD-asp	11.04	11.80	11.64
5RE9-LPZ	GOLD-asp	6.22	6.33	6.36
5RH2-UH7	GOLD-asp	0.61	3.88	2.71
7NT3-UQZ	GOLD-asp	1.47	1.47	2.88
5R81-RZJ	GOLD-asp	1.96	2.76	2.45
5RF1-T5G	GOLD-asp	1.70	2.55	2.19
5RH1-UGV	GOLD-asp	1.42	1.42	2.06
7M8P-YSJ	GOLD-asp	0.58	0.72	1.00
7L11-XF1	GOLD-asp	2.06	2.06	5.69
7M8Y-YTM	GOLD-asp	5.25	5.25	8.08
7L13-XF7	GOLD-asp	7.70	9.16	8.75
5RF6-NTG	GOLD-asp	1.43	1.50	1.83
6W63-X77	GOLD-asp	1.20	1.20	4.67
5RF2-HVB	GOLD-asp	0.78	8.67	5.64
7NUK-USH	GOLD-asp	6.37	6.72	6.78
7N8C-YD1	GOLD-asp	1.34	1.72	2.63
5RGK-U0V	GOLD-asp	8.36	9.77	9.11
7CA8-FNO	GOLD-asp	5.49	5.66	5.59
7LFE-XWS	GOLD-asp	2.27	3.95	3.03
5RGQ-U1V	GOLD-asp	1.45	2.51	2.12
5REH-AWP	GOLD-asp	2.35	2.92	3.81
5REI-T1S	GOLD-asp	7.71	8.36	8.23
7KX5-X7V	GOLD-asp	5.23	5.74	6.30
5R7Z-HWH	GOLD-asp	5.30	5.54	5.46
7ANS-RNW	GOLD-asp	2.88	3.01	2.94
5RGX-UGP	GOLD-asp	0.63	0.63	3.81
5RE5-T0J	GOLD-asp	12.58	12.71	13.21
5RH3-UHA	GOLD-asp	2.09	2.22	3.06
5REG-LWA	GOLD-asp	0.49	15.60	7.24
7M8N-YSP	GOLD-asp	7.15	8.05	8.04
5RF4-T5Y	GOLD-asp	11.56	11.91	11.80
7LDX-R9V	GOLD-asp	6.74	7.36	7.16
7JU7-G65	GOLD-asp	2.26	2.26	6.23
7M91-YU4	GOLD-asp	1.03	1.33	3.90
7M90-YTS	GOLD-asp	1.12	1.12	4.57
7LMD-Y6A	GOLD-asp	1.01	1.01	5.42
7M8M-YSG	GOLD-asp	0.31	0.41	2.34
7AXM-93J	GOLD-asp	3.48	9.53	7.71
7AWU-S8B	GOLD-asp	7.31	8.04	7.75
7AGA-LZE	GOLD-asp	1.65	1.90	5.63
5RGS-S7V	GOLD-asp	14.00	14.16	14.19
5R84-GWS	GOLD-asp	0.30	0.30	2.18
7AMJ-RMZ	GOLD-asp	3.42	13.00	8.45
5RGZ-UH1	GOLD-asp	0.71	0.71	3.30
5RH0-UH4	GOLD-asp	3.09	3.09	6.09
7M8O-YSM	GOLD-asp	1.21	1.21	4.96
5RGW-UGM	GOLD-asp	2.73	2.73	5.05
7S4B-87H	GOLD-asp	0.40	0.42	1.48
7L5D-XNJ	GOLD-asp	7.10	10.69	9.40
7AOL-RQH	GOLD-asp	8.55	8.55	13.22
7LTJ-YD1	GOLD-asp	0.26	0.47	0.91
5RF7-T67	GOLD-asp	0.86	6.47	5.65
7LME-Y6J	GOLD-asp	8.07	8.07	8.42
7AWW-CLU	GOLD-asp	7.82	13.01	10.52
6W63-X77	GOLD-chemscore	5.31	5.31	6.10
7L12-XF4	GOLD-chemscore	0.48	0.51	2.26
5RH1-UGV	GOLD-chemscore	1.19	1.19	4.03
5RGZ-UH1	GOLD-chemscore	3.48	7.41	6.71
7M8Y-YTM	GOLD-chemscore	3.88	10.11	7.85
5R84-GWS	GOLD-chemscore	0.28	0.28	2.30
7L11-XF1	GOLD-chemscore	0.45	1.82	1.58
7M8P-YSJ	GOLD-chemscore	1.01	1.71	2.71
5RF6-NTG	GOLD-chemscore	0.92	0.92	1.09
7AOL-RQH	GOLD-chemscore	9.11	9.89	11.36
7L13-XF7	GOLD-chemscore	0.50	1.71	5.41
7S3K-Z26	GOLD-chemscore	0.82	0.95	2.30
7M8Z-YTV	GOLD-chemscore	1.38	1.38	1.97
5RGH-U0M	GOLD-chemscore	0.62	3.52	4.23
7AQI-QEL	GOLD-chemscore	9.25	9.25	9.54
5RFB-K3S	GOLD-chemscore	7.10	7.10	11.53
5RFD-T6J	GOLD-chemscore	13.63	13.63	15.05
7M8O-YSM	GOLD-chemscore	1.23	1.23	1.87
7LFP-XY4	GOLD-chemscore	1.42	4.93	3.61
7AQE-RV5	GOLD-chemscore	3.89	7.10	6.04
7LTJ-YD1	GOLD-chemscore	0.32	0.32	1.10
5RF5-HV2	GOLD-chemscore	8.48	8.56	8.63
7P51-5P9	GOLD-chemscore	6.80	6.95	6.88
7KVR-X4V	GOLD-chemscore	9.09	12.47	12.07
7AVD-S1W	GOLD-chemscore	5.60	5.96	6.15
5R7Y-JFM	GOLD-chemscore	3.27	4.69	3.86
5RGU-UGD	GOLD-chemscore	5.11	5.11	6.41
7JU7-G65	GOLD-chemscore	10.39	11.64	10.88
7S3S-860	GOLD-chemscore	0.56	0.68	1.00
7AGA-LZE	GOLD-chemscore	7.05	7.93	7.47
5RF2-HVB	GOLD-chemscore	0.64	0.95	0.90
7AF0-R9W	GOLD-chemscore	8.78	10.43	9.31
7N8C-YD1	GOLD-chemscore	0.21	0.21	1.44
7NUK-USH	GOLD-chemscore	3.17	4.23	3.58
5RH3-UHA	GOLD-chemscore	1.98	3.44	3.61
5RGW-UGM	GOLD-chemscore	0.66	0.66	4.95
5RE7-T0S	GOLD-chemscore	2.95	3.70	4.44
5RF9-S7D	GOLD-chemscore	6.04	6.83	7.60
5RGV-UGG	GOLD-chemscore	0.73	0.93	1.41
5RF8-SFY	GOLD-chemscore	6.34	10.67	9.23
7AWU-S8B	GOLD-chemscore	7.57	7.73	7.74
5RF7-T67	GOLD-chemscore	2.23	2.23	4.91
5RED-JJG	GOLD-chemscore	7.07	7.07	7.47
5RFE-JGG	GOLD-chemscore	5.02	5.32	5.55
5R83-K0G	GOLD-chemscore	0.62	0.62	1.82
5RE4-SZY	GOLD-chemscore	0.84	0.84	4.14
5REZ-T54	GOLD-chemscore	1.07	1.25	2.78
7L5D-XNJ	GOLD-chemscore	7.44	9.50	9.50
5R80-RZG	GOLD-chemscore	2.53	2.91	2.87
7KW5-X4Y	GOLD-chemscore	4.82	5.24	7.09
7L0D-0EN	GOLD-chemscore	0.91	0.91	3.91
7AXO-QCP	GOLD-chemscore	7.03	7.06	7.09
5RGI-U0P	GOLD-chemscore	5.49	5.64	5.86
5RE9-LPZ	GOLD-chemscore	6.20	6.76	6.54
5REG-LWA	GOLD-chemscore	1.60	1.86	1.79
7B83-PK8	GOLD-chemscore	5.86	7.46	6.96
5REF-6SU	GOLD-chemscore	6.01	6.21	6.27
5RE8-T0V	GOLD-chemscore	12.70	13.65	13.81
5RGS-S7V	GOLD-chemscore	10.64	16.42	13.96
7CA8-FNO	GOLD-chemscore	6.65	7.57	7.45
5RE5-T0J	GOLD-chemscore	9.06	14.61	12.94
5RGQ-U1V	GOLD-chemscore	1.34	4.85	3.48
7M8N-YSP	GOLD-chemscore	1.23	1.23	4.11
7LFE-XWS	GOLD-chemscore	2.34	4.72	3.77
5REH-AWP	GOLD-chemscore	7.94	8.20	8.09
5REI-T1S	GOLD-chemscore	7.63	7.80	9.44
7KX5-X7V	GOLD-chemscore	5.77	7.08	6.92
7LMD-Y6A	GOLD-chemscore	0.50	0.50	3.40
5RGK-U0V	GOLD-chemscore	7.32	7.40	8.16
5R7Z-HWH	GOLD-chemscore	2.41	2.41	4.43
5RF1-T5G	GOLD-chemscore	2.23	3.16	4.19
5RGX-UGP	GOLD-chemscore	3.22	3.22	6.45
7AXM-93J	GOLD-chemscore	6.56	8.36	7.29
7NT3-UQZ	GOLD-chemscore	5.24	5.24	7.11
5R81-RZJ	GOLD-chemscore	0.75	2.32	2.07
5RH2-UH7	GOLD-chemscore	0.64	0.66	1.38
5RFA-JGY	GOLD-chemscore	8.73	9.83	9.82
5RFC-K1Y	GOLD-chemscore	7.32	7.47	7.55
7M90-YTS	GOLD-chemscore	1.96	1.96	6.87
7ANS-RNW	GOLD-chemscore	3.34	3.34	3.67
7LME-Y6J	GOLD-chemscore	0.91	0.91	2.99
7L14-XFD	GOLD-chemscore	0.64	0.64	2.75
7S4B-87H	GOLD-chemscore	0.27	0.27	3.61
5RH0-UH4	GOLD-chemscore	1.56	6.88	5.11
7AP6-RQN	GOLD-chemscore	5.24	5.78	6.23
5RHD-US7	GOLD-chemscore	0.46	0.54	0.72
6W79-X77	GOLD-chemscore	0.59	0.59	5.13
7LDL-XV4	GOLD-chemscore	5.42	8.48	8.00
5REE-T1M	GOLD-chemscore	7.04	7.36	7.82
5RG1-T9J	GOLD-chemscore	4.60	5.69	6.35
5RGY-UGS	GOLD-chemscore	1.93	1.93	6.28
5RF4-T5Y	GOLD-chemscore	12.16	13.31	13.08
5REC-T1J	GOLD-chemscore	2.68	9.56	7.29
5RE6-O0S	GOLD-chemscore	5.02	10.92	7.63
6YVF-A82	GOLD-chemscore	1.33	1.44	2.63
7ABU-R6Q	GOLD-chemscore	3.86	3.86	4.95
7MPB-ASC	GOLD-chemscore	2.84	3.48	3.12
7LDX-R9V	GOLD-chemscore	7.02	11.57	9.06
6M2N-3WL	GOLD-chemscore	1.02	4.41	4.57
5REA-JGP	GOLD-chemscore	12.04	14.11	12.78
5R82-RZS	GOLD-chemscore	4.73	5.21	5.07
5RF0-T5D	GOLD-chemscore	8.02	8.31	8.36
7M8M-YSG	GOLD-chemscore	1.20	1.27	3.42
5RH8-UHM	GOLD-chemscore	6.25	6.56	6.46
7LMF-Y6G	GOLD-chemscore	1.15	1.56	2.49
5RGJ-U0S	GOLD-chemscore	5.07	7.48	6.36
7N44-06I	GOLD-chemscore	0.66	0.66	4.70
5REB-T0Y	GOLD-chemscore	4.90	4.90	5.04
5RF3-T5V	GOLD-chemscore	1.05	9.08	8.04
7AWR-S7W	GOLD-chemscore	6.92	7.12	7.04
7A1U-FUA	GOLD-chemscore	6.24	6.90	6.55
7AMJ-RMZ	GOLD-chemscore	9.60	9.60	9.83
5RH4-UHG	GOLD-chemscore	4.69	5.08	5.97
7M8X-YTJ	GOLD-chemscore	0.70	0.70	1.88
7KVL-X4P	GOLD-chemscore	6.62	6.99	7.04
5RGG-NZD	GOLD-chemscore	7.76	13.62	10.86
7AWW-CLU	GOLD-chemscore	6.40	16.40	9.35
7M91-YU4	GOLD-chemscore	1.30	1.37	2.55
7L10-XEY	GOLD-chemscore	0.76	1.23	1.45
5RGQ-U1V	GOLD-goldscore	2.92	2.95	3.85
7AXM-93J	GOLD-goldscore	5.86	8.52	8.04
7NT3-UQZ	GOLD-goldscore	1.86	3.85	2.47
6M2N-3WL	GOLD-goldscore	2.36	3.36	3.28
5RE5-T0J	GOLD-goldscore	4.78	5.83	5.99
5RGX-UGP	GOLD-goldscore	0.29	0.33	3.20
5R81-RZJ	GOLD-goldscore	1.47	1.51	1.54
6YVF-A82	GOLD-goldscore	1.20	5.72	5.93
5RH2-UH7	GOLD-goldscore	0.30	0.42	0.38
5RF3-T5V	GOLD-goldscore	2.28	2.28	2.29
5RF4-T5Y	GOLD-goldscore	12.08	12.67	12.53
5R82-RZS	GOLD-goldscore	4.53	4.62	4.86
5REH-AWP	GOLD-goldscore	7.60	8.12	7.96
5RG1-T9J	GOLD-goldscore	0.59	7.43	5.35
5RF1-T5G	GOLD-goldscore	1.94	2.33	2.23
5R7Z-HWH	GOLD-goldscore	1.40	1.40	5.44
7LFE-XWS	GOLD-goldscore	1.15	4.83	2.90
7LMD-Y6A	GOLD-goldscore	0.61	0.90	3.32
5RGY-UGS	GOLD-goldscore	7.69	9.00	8.01
7ANS-RNW	GOLD-goldscore	2.65	2.69	3.46
7M8N-YSP	GOLD-goldscore	7.14	8.07	7.96
5REI-T1S	GOLD-goldscore	5.06	5.06	5.36
7KX5-X7V	GOLD-goldscore	0.78	0.78	4.77
7AQI-QEL	GOLD-goldscore	8.77	9.21	9.27
5REB-T0Y	GOLD-goldscore	1.23	1.67	2.13
7M8M-YSG	GOLD-goldscore	0.42	0.58	0.53
5RFC-K1Y	GOLD-goldscore	4.33	4.39	4.37
7AWU-S8B	GOLD-goldscore	8.00	8.07	8.08
5RE4-SZY	GOLD-goldscore	0.76	0.78	0.97
5REZ-T54	GOLD-goldscore	0.82	3.98	2.38
7LMF-Y6G	GOLD-goldscore	0.54	0.98	1.86
7KW5-X4Y	GOLD-goldscore	8.79	12.01	11.26
5R80-RZG	GOLD-goldscore	2.51	2.60	2.70
7KVL-X4P	GOLD-goldscore	7.61	7.61	7.69
5RGI-U0P	GOLD-goldscore	0.40	0.99	0.65
7AXO-QCP	GOLD-goldscore	7.19	11.19	9.69
7L0D-0EN	GOLD-goldscore	1.23	1.29	1.87
7N44-06I	GOLD-goldscore	0.51	0.55	0.57
5REG-LWA	GOLD-goldscore	5.59	5.85	5.78
7L5D-XNJ	GOLD-goldscore	0.72	0.72	7.63
5RH3-UHA	GOLD-goldscore	0.65	0.69	1.22
7AMJ-RMZ	GOLD-goldscore	7.14	12.48	10.90
7AWR-S7W	GOLD-goldscore	3.31	8.00	5.07
5R83-K0G	GOLD-goldscore	0.96	0.96	2.40
5RED-JJG	GOLD-goldscore	5.65	5.65	5.77
5RHD-US7	GOLD-goldscore	0.36	1.11	0.75
5RFA-JGY	GOLD-goldscore	6.47	6.49	6.51
5REA-JGP	GOLD-goldscore	11.27	12.23	12.04
5REF-6SU	GOLD-goldscore	6.01	7.18	7.36
5RF0-T5D	GOLD-goldscore	0.15	0.25	1.36
5RE8-T0V	GOLD-goldscore	12.46	12.88	12.83
7S4B-87H	GOLD-goldscore	0.36	1.49	0.90
7B83-PK8	GOLD-goldscore	5.02	5.80	5.58
7M90-YTS	GOLD-goldscore	0.52	0.54	1.55
5RGS-S7V	GOLD-goldscore	13.22	14.86	14.34
5RF9-S7D	GOLD-goldscore	1.15	1.15	5.86
5RH8-UHM	GOLD-goldscore	5.91	5.92	5.94
6W79-X77	GOLD-goldscore	0.60	0.96	1.81
5RF7-T67	GOLD-goldscore	0.39	0.49	0.47
5RF8-SFY	GOLD-goldscore	12.84	12.84	14.05
5RGV-UGG	GOLD-goldscore	0.67	4.66	2.42
5RFE-JGG	GOLD-goldscore	4.06	6.89	4.71
5RE7-T0S	GOLD-goldscore	8.03	10.79	9.50
7AOL-RQH	GOLD-goldscore	5.57	15.16	7.89
7N8C-YD1	GOLD-goldscore	1.70	1.70	1.72
7S3K-Z26	GOLD-goldscore	0.59	0.62	0.63
5REE-T1M	GOLD-goldscore	0.66	12.77	8.20
7AQE-RV5	GOLD-goldscore	3.49	5.36	4.93
7L11-XF1	GOLD-goldscore	0.49	0.51	1.46
7JU7-G65	GOLD-goldscore	1.75	1.75	7.83
7L12-XF4	GOLD-goldscore	0.58	0.58	1.01
7LFP-XY4	GOLD-goldscore	1.05	6.00	2.68
7AWW-CLU	GOLD-goldscore	7.16	7.27	7.59
5R84-GWS	GOLD-goldscore	0.50	0.63	1.12
5REC-T1J	GOLD-goldscore	5.43	6.28	6.26
5RH1-UGV	GOLD-goldscore	0.55	1.32	3.31
7M8Z-YTV	GOLD-goldscore	0.74	0.87	0.81
5RH4-UHG	GOLD-goldscore	5.57	5.57	6.51
5RGJ-U0S	GOLD-goldscore	6.76	11.49	8.31
7P51-5P9	GOLD-goldscore	0.47	0.72	0.63
7AGA-LZE	GOLD-goldscore	8.01	8.12	8.10
7MPB-ASC	GOLD-goldscore	1.92	4.50	3.70
5RF5-HV2	GOLD-goldscore	1.41	1.47	1.51
7CA8-FNO	GOLD-goldscore	1.48	3.05	2.69
7AF0-R9W	GOLD-goldscore	7.59	7.64	7.62
7S3S-860	GOLD-goldscore	0.39	0.52	1.92
7AVD-S1W	GOLD-goldscore	7.23	7.23	7.41
7LTJ-YD1	GOLD-goldscore	1.70	1.74	1.72
5RGU-UGD	GOLD-goldscore	0.58	1.07	0.78
5RH0-UH4	GOLD-goldscore	0.84	0.94	4.45
7ABU-R6Q	GOLD-goldscore	3.52	9.62	6.47
7LDL-XV4	GOLD-goldscore	0.64	0.72	0.67
7KVR-X4V	GOLD-goldscore	10.31	10.31	12.41
7LDX-R9V	GOLD-goldscore	0.36	0.66	1.60
7L10-XEY	GOLD-goldscore	0.43	0.43	0.77
7AP6-RQN	GOLD-goldscore	3.12	7.60	6.65
5R7Y-JFM	GOLD-goldscore	7.36	7.85	7.64
5RFB-K3S	GOLD-goldscore	12.16	12.33	12.28
7M8X-YTJ	GOLD-goldscore	0.44	0.44	1.02
5RF2-HVB	GOLD-goldscore	2.41	8.29	3.66
5RFD-T6J	GOLD-goldscore	8.58	16.26	14.50
5RGW-UGM	GOLD-goldscore	0.29	0.42	0.51
7M8O-YSM	GOLD-goldscore	0.80	1.35	1.16
5RGK-U0V	GOLD-goldscore	8.07	8.23	8.24
7M8Y-YTM	GOLD-goldscore	0.61	1.25	2.40
5RGG-NZD	GOLD-goldscore	6.32	13.20	11.10
5RGH-U0M	GOLD-goldscore	2.64	6.44	5.57
5RE9-LPZ	GOLD-goldscore	6.90	7.49	7.30
7A1U-FUA	GOLD-goldscore	6.36	6.36	6.50
7M8P-YSJ	GOLD-goldscore	0.58	0.75	0.83
7L13-XF7	GOLD-goldscore	0.48	1.26	0.84
7M91-YU4	GOLD-goldscore	0.74	0.74	0.90
7L14-XFD	GOLD-goldscore	0.51	0.60	1.45
5RF6-NTG	GOLD-goldscore	2.43	2.47	2.48
5RGZ-UH1	GOLD-goldscore	0.35	0.38	1.78
5RE6-O0S	GOLD-goldscore	6.18	6.48	6.31
7LME-Y6J	GOLD-goldscore	0.90	0.90	1.81
7NUK-USH	GOLD-goldscore	3.83	7.38	6.11
6W63-X77	GOLD-goldscore	0.64	0.64	1.83
5REG-LWA	GOLD-plp	1.32	2.07	1.73
7LDX-R9V	GOLD-plp	0.43	8.20	6.53
5RFE-JGG	GOLD-plp	4.33	7.21	6.77
5RHD-US7	GOLD-plp	0.47	0.54	0.54
7AVD-S1W	GOLD-plp	5.22	7.16	6.48
7LME-Y6J	GOLD-plp	1.82	1.82	6.61
5RFD-T6J	GOLD-plp	6.65	13.50	11.54
7AWU-S8B	GOLD-plp	6.95	6.95	7.55
7P51-5P9	GOLD-plp	0.66	0.78	4.73
5RFB-K3S	GOLD-plp	9.91	12.57	11.89
7L10-XEY	GOLD-plp	0.24	0.24	1.65
7AXO-QCP	GOLD-plp	6.96	6.96	7.93
7N44-06I	GOLD-plp	1.18	1.18	4.63
5RH4-UHG	GOLD-plp	3.14	5.79	4.26
7AQE-RV5	GOLD-plp	3.38	5.80	4.76
7L5D-XNJ	GOLD-plp	2.24	2.24	8.04
5REZ-T54	GOLD-plp	3.75	4.20	4.04
7LMF-Y6G	GOLD-plp	2.08	5.78	6.30
7KW5-X4Y	GOLD-plp	8.39	10.31	9.78
7LTJ-YD1	GOLD-plp	0.20	0.28	0.59
5R83-K0G	GOLD-plp	0.60	0.61	1.52
7CA8-FNO	GOLD-plp	5.50	5.91	6.34
5R7Y-JFM	GOLD-plp	5.51	6.01	5.89
5RF1-T5G	GOLD-plp	2.29	2.39	2.37
5RGZ-UH1	GOLD-plp	0.46	0.46	1.69
5RG1-T9J	GOLD-plp	4.62	5.08	5.11
7L13-XF7	GOLD-plp	1.18	1.18	5.44
7ANS-RNW	GOLD-plp	2.63	2.63	4.15
7AWW-CLU	GOLD-plp	6.41	7.31	6.78
5RF4-T5Y	GOLD-plp	11.67	11.67	12.11
7KX5-X7V	GOLD-plp	4.64	6.05	6.25
5RE6-O0S	GOLD-plp	6.43	11.12	8.50
5RF6-NTG	GOLD-plp	1.32	1.34	1.40
7M8N-YSP	GOLD-plp	1.21	1.21	6.68
5RF3-T5V	GOLD-plp	0.56	0.86	1.46
5REH-AWP	GOLD-plp	4.79	7.99	7.31
5RF2-HVB	GOLD-plp	1.03	2.52	2.13
5RGQ-U1V	GOLD-plp	1.15	4.83	1.99
7AOL-RQH	GOLD-plp	5.40	14.30	8.58
5RGK-U0V	GOLD-plp	7.49	8.18	7.82
6M2N-3WL	GOLD-plp	0.28	1.97	2.03
5RGG-NZD	GOLD-plp	4.88	5.00	4.97
7S4B-87H	GOLD-plp	1.11	2.35	3.04
7L11-XF1	GOLD-plp	0.38	0.38	3.14
6YVF-A82	GOLD-plp	0.99	1.58	1.58
7LDL-XV4	GOLD-plp	0.72	0.72	4.89
5RF9-S7D	GOLD-plp	6.57	11.40	8.84
5RH8-UHM	GOLD-plp	2.51	5.98	5.28
5RGS-S7V	GOLD-plp	7.96	9.05	9.81
7B83-PK8	GOLD-plp	5.27	5.53	5.63
7S3S-860	GOLD-plp	0.23	0.23	0.38
7MPB-ASC	GOLD-plp	3.42	3.50	3.48
5REF-6SU	GOLD-plp	3.93	5.75	5.50
7NT3-UQZ	GOLD-plp	2.93	2.93	5.46
7AF0-R9W	GOLD-plp	8.85	9.29	9.74
5RF0-T5D	GOLD-plp	4.11	4.42	4.26
5RFC-K1Y	GOLD-plp	4.37	4.46	4.99
5RH3-UHA	GOLD-plp	2.10	2.10	5.95
7N8C-YD1	GOLD-plp	0.33	0.33	2.12
5RH2-UH7	GOLD-plp	0.41	0.41	1.22
5RH1-UGV	GOLD-plp	1.76	2.98	3.00
7AP6-RQN	GOLD-plp	3.67	4.96	4.89
7AXM-93J	GOLD-plp	3.23	7.12	6.44
7AGA-LZE	GOLD-plp	8.11	8.21	8.35
7AQI-QEL	GOLD-plp	9.06	9.08	9.32
5RF8-SFY	GOLD-plp	9.08	9.13	10.57
7AMJ-RMZ	GOLD-plp	5.32	10.20	9.18
7M8X-YTJ	GOLD-plp	0.98	1.77	2.83
5RGW-UGM	GOLD-plp	4.47	7.79	5.94
7L14-XFD	GOLD-plp	1.03	1.76	1.66
5RGU-UGD	GOLD-plp	1.18	1.19	5.19
7NUK-USH	GOLD-plp	3.43	7.79	5.37
7M8M-YSG	GOLD-plp	0.39	0.41	1.93
7S3K-Z26	GOLD-plp	0.46	0.46	1.29
5R84-GWS	GOLD-plp	0.36	0.40	0.57
5RED-JJG	GOLD-plp	5.06	5.80	6.61
5REB-T0Y	GOLD-plp	6.15	6.60	6.66
7LFP-XY4	GOLD-plp	1.58	1.61	1.62
7L12-XF4	GOLD-plp	0.53	0.53	5.70
7JU7-G65	GOLD-plp	1.40	12.58	8.53
5RE5-T0J	GOLD-plp	6.22	13.54	9.01
5RE8-T0V	GOLD-plp	8.76	8.76	9.91
5RGV-UGG	GOLD-plp	1.06	1.16	2.21
7M91-YU4	GOLD-plp	0.49	0.49	4.40
5REI-T1S	GOLD-plp	3.22	6.63	6.95
5RGY-UGS	GOLD-plp	2.38	2.38	7.45
7A1U-FUA	GOLD-plp	6.37	6.86	6.52
5REA-JGP	GOLD-plp	11.73	12.56	12.31
7M8O-YSM	GOLD-plp	0.51	0.51	3.62
7LFE-XWS	GOLD-plp	4.60	4.83	4.73
5R82-RZS	GOLD-plp	4.73	7.44	6.39
5RE7-T0S	GOLD-plp	3.74	3.74	6.30
5RFA-JGY	GOLD-plp	7.57	7.76	8.13
7KVR-X4V	GOLD-plp	12.54	12.54	12.68
5RE4-SZY	GOLD-plp	0.50	0.50	1.57
5RGJ-U0S	GOLD-plp	5.89	6.21	7.60
5RGI-U0P	GOLD-plp	0.46	0.46	2.22
7KVL-X4P	GOLD-plp	6.89	6.89	7.28
5RE9-LPZ	GOLD-plp	6.34	6.42	6.42
7M8P-YSJ	GOLD-plp	0.40	0.41	4.74
7ABU-R6Q	GOLD-plp	4.01	14.87	12.39
5RGX-UGP	GOLD-plp	0.27	0.27	4.67
5RF7-T67	GOLD-plp	0.48	0.68	0.98
7AWR-S7W	GOLD-plp	4.38	8.12	6.18
5RGH-U0M	GOLD-plp	1.21	5.18	4.70
7M8Y-YTM	GOLD-plp	1.22	1.22	5.53
7L0D-0EN	GOLD-plp	1.25	1.25	5.08
5R7Z-HWH	GOLD-plp	2.37	2.37	3.43
5R81-RZJ	GOLD-plp	1.05	1.05	1.08
7M90-YTS	GOLD-plp	1.11	1.15	4.64
5RH0-UH4	GOLD-plp	6.21	6.26	6.25
5RF5-HV2	GOLD-plp	2.80	9.03	6.28
5REC-T1J	GOLD-plp	2.68	5.06	4.46
7LMD-Y6A	GOLD-plp	0.33	0.33	3.47
6W79-X77	GOLD-plp	7.03	7.13	7.31
6W63-X77	GOLD-plp	1.32	6.99	5.43
7M8Z-YTV	GOLD-plp	0.61	0.61	1.13
5R80-RZG	GOLD-plp	2.81	2.81	3.68
5REE-T1M	GOLD-plp	0.58	0.58	4.80
7AWR-S7W	Glide-SP	4.44	4.44	5.19
5RF0-T5D	Glide-SP	4.55	4.95	5.25
7M8Z-YTV	Glide-SP	1.33	1.33	2.13
5REI-T1S	Glide-SP	5.38	11.11	6.75
5RF1-T5G	Glide-SP	1.74	4.78	4.27
7LMF-Y6G	Glide-SP	1.24	1.76	1.99
6YVF-A82	Glide-SP	1.19	1.19	4.24
5REA-JGP	Glide-SP	11.46	13.11	11.92
7KX5-X7V	Glide-SP	4.70	6.55	6.74
5RH1-UGV	Glide-SP	2.88	6.53	4.60
5RHD-US7	Glide-SP	1.20	1.20	5.05
5R7Z-HWH	Glide-SP	5.55	5.55	5.74
7AQI-QEL	Glide-SP	8.29	8.97	9.60
7ANS-RNW	Glide-SP	2.40	3.91	3.32
5RH8-UHM	Glide-SP	2.32	2.47	3.69
5RGY-UGS	Glide-SP	0.97	0.97	5.63
5R82-RZS	Glide-SP	4.72	4.72	5.68
7LDL-XV4	Glide-SP	1.14	3.30	4.68
7M8P-YSJ	Glide-SP	0.56	0.56	2.53
5RGJ-U0S	Glide-SP	10.76	11.75	11.16
7MPB-ASC	Glide-SP	3.95	7.30	5.17
5RF6-NTG	Glide-SP	6.36	6.40	6.43
7M8Y-YTM	Glide-SP	0.81	1.02	1.21
5RH4-UHG	Glide-SP	5.73	5.98	5.86
7AP6-RQN	Glide-SP	2.99	5.33	4.74
7L12-XF4	Glide-SP	0.55	0.55	2.00
5RF2-HVB	Glide-SP	7.43	9.64	8.71
5REE-T1M	Glide-SP	0.49	0.49	2.79
5RE6-O0S	Glide-SP	5.04	7.84	6.71
6W63-X77	Glide-SP	5.94	7.57	6.84
7L11-XF1	Glide-SP	0.54	0.54	3.44
7LFE-XWS	Glide-SP	1.68	2.29	2.67
5RGK-U0V	Glide-SP	4.43	7.52	6.90
5RGG-NZD	Glide-SP	7.02	8.72	8.11
5REC-T1J	Glide-SP	4.45	4.45	8.95
5REB-T0Y	Glide-SP	5.94	6.01	6.90
7CA8-FNO	Glide-SP	5.28	6.00	5.71
6M2N-3WL	Glide-SP	0.25	0.25	3.71
7NUK-USH	Glide-SP	4.55	4.55	6.77
7NT3-UQZ	Glide-SP	2.95	7.77	6.58
5RGQ-U1V	Glide-SP	2.47	2.47	8.18
5RF3-T5V	Glide-SP	0.94	1.40	2.14
7L10-XEY	Glide-SP	1.28	2.08	3.32
5RE5-T0J	Glide-SP	3.68	8.94	6.76
5RG1-T9J	Glide-SP	2.56	3.95	3.36
7A1U-FUA	Glide-SP	4.03	6.20	6.03
5REH-AWP	Glide-SP	2.97	7.60	5.98
7M8X-YTJ	Glide-SP	1.73	1.79	4.51
7N8C-YD1	Glide-SP	8.30	8.42	8.40
6W79-X77	Glide-SP	0.95	0.95	4.76
5RGX-UGP	Glide-SP	0.79	7.35	5.64
5REZ-T54	Glide-SP	3.75	3.75	5.40
7AOL-RQH	Glide-SP	5.12	5.14	5.31
5RGW-UGM	Glide-SP	1.64	1.64	3.75
5RED-JJG	Glide-SP	9.63	12.21	10.79
5RGZ-UH1	Glide-SP	1.56	1.56	3.84
5R83-K0G	Glide-SP	3.32	3.96	4.35
7LFP-XY4	Glide-SP	1.20	1.54	2.37
7S3S-860	Glide-SP	0.50	2.46	3.55
7AGA-LZE	Glide-SP	7.80	9.19	8.74
5R84-GWS	Glide-SP	1.22	1.22	4.17
5RFE-JGG	Glide-SP	4.92	7.13	5.80
5RGV-UGG	Glide-SP	4.24	4.24	6.44
7AQE-RV5	Glide-SP	4.81	4.81	8.25
7KVL-X4P	Glide-SP	6.70	8.27	7.37
7L5D-XNJ	Glide-SP	2.19	2.19	8.89
5RE4-SZY	Glide-SP	0.80	0.80	3.84
7JU7-G65	Glide-SP	1.79	1.79	2.45
7LMD-Y6A	Glide-SP	0.90	7.23	3.57
7P51-5P9	Glide-SP	0.76	0.76	4.98
5RGI-U0P	Glide-SP	0.97	0.97	1.80
7AVD-S1W	Glide-SP	5.68	7.09	6.51
7AWU-S8B	Glide-SP	7.68	8.06	8.58
5REG-LWA	Glide-SP	6.03	6.03	7.22
7L0D-0EN	Glide-SP	7.02	7.02	7.02
5RF5-HV2	Glide-SP	0.83	0.83	1.67
5RGS-S7V	Glide-SP	2.08	7.10	5.06
5RF7-T67	Glide-SP	0.73	6.20	4.10
5R7Y-JFM	Glide-SP	5.62	5.62	6.29
7AXO-QCP	Glide-SP	6.82	8.57	7.46
7AXM-93J	Glide-SP	2.97	2.97	6.17
5R80-RZG	Glide-SP	2.46	2.46	4.70
7M90-YTS	Glide-SP	1.14	1.14	2.85
7KVR-X4V	Glide-SP	8.74	12.30	10.97
7KW5-X4Y	Glide-SP	2.72	6.97	5.26
7M8N-YSP	Glide-SP	1.43	1.43	4.56
5RF8-SFY	Glide-SP	5.65	7.56	7.30
7LTJ-YD1	Glide-SP	0.52	0.52	5.45
7M91-YU4	Glide-SP	0.84	0.93	2.61
5REF-6SU	Glide-SP	5.85	5.85	7.03
5RFA-JGY	Glide-SP	0.79	6.49	6.66
7S4B-87H	Glide-SP	0.52	0.52	2.05
7M8M-YSG	Glide-SP	0.48	0.98	2.98
5RFC-K1Y	Glide-SP	6.05	6.05	6.70
7S3K-Z26	Glide-SP	0.70	0.70	3.91
5RGU-UGD	Glide-SP	1.10	1.10	5.15
5RH3-UHA	Glide-SP	0.78	0.78	4.40
7L13-XF7	Glide-SP	0.54	0.54	4.16
7AMJ-RMZ	Glide-SP	3.23	10.10	7.78
5RH2-UH7	Glide-SP	0.80	6.93	5.24
5RGH-U0M	Glide-SP	5.26	5.74	6.12
5RFB-K3S	Glide-SP	5.75	6.40	6.07
7N44-06I	Glide-SP	0.49	0.49	4.61
5R81-RZJ	Glide-SP	1.05	1.81	1.94
5RF4-T5Y	Glide-SP	6.55	9.17	7.84
7ABU-R6Q	Glide-SP	2.20	2.20	6.51
7LDX-R9V	Glide-SP	0.33	7.08	1.93
7L14-XFD	Glide-SP	0.56	0.56	2.88
7M8O-YSM	Glide-SP	1.12	1.12	4.22
5RE9-LPZ	Glide-SP	5.85	5.85	6.44
5RH0-UH4	Glide-SP	3.94	6.03	5.61
5RE8-T0V	Glide-SP	11.17	11.17	11.55
5RF9-S7D	Glide-SP	7.33	12.23	9.61
5RFD-T6J	Glide-SP	13.58	13.58	13.77
7B83-PK8	Glide-SP	3.41	7.09	5.90
7AWW-CLU	Glide-SP	4.50	6.33	6.05
7AF0-R9W	Glide-SP	8.73	9.73	9.21
7LME-Y6J	Glide-SP	1.72	5.16	2.87
5RE7-T0S	Glide-SP	9.28	10.13	9.87
5RFB-K3S	Glide-XP	5.85	6.30	6.17
7L14-XFD	Glide-XP	0.58	1.75	1.37
7ABU-R6Q	Glide-XP	4.84	5.80	8.60
7AVD-S1W	Glide-XP	7.07	7.08	7.09
7LFP-XY4	Glide-XP	1.36	1.40	1.46
7L10-XEY	Glide-XP	1.22	1.22	1.85
5RGH-U0M	Glide-XP	4.25	4.25	5.81
7A1U-FUA	Glide-XP	5.37	5.37	5.93
7AQI-QEL	Glide-XP	4.96	4.96	7.67
5REC-T1J	Glide-XP	10.81	11.54	11.28
7P51-5P9	Glide-XP	0.76	0.76	3.45
5RH4-UHG	Glide-XP	5.70	5.70	6.12
7AQE-RV5	Glide-XP	3.07	8.43	5.59
5RE9-LPZ	Glide-XP	5.81	5.81	6.53
5RGJ-U0S	Glide-XP	8.22	8.66	8.85
7M91-YU4	Glide-XP	0.51	0.51	0.73
5RF4-T5Y	Glide-XP	6.79	7.84	7.93
5RH0-UH4	Glide-XP	6.50	7.65	6.80
7AWW-CLU	Glide-XP	6.31	6.31	10.56
7LDX-R9V	Glide-XP	6.69	6.69	6.90
7M8O-YSM	Glide-XP	0.52	0.57	0.92
7LME-Y6J	Glide-XP	0.85	5.78	4.64
7JU7-G65	Glide-XP	1.55	1.55	3.65
7LTJ-YD1	Glide-XP	0.39	0.51	2.48
5R84-GWS	Glide-XP	1.36	1.74	1.67
7S4B-87H	Glide-XP	0.52	0.86	0.99
7AGA-LZE	Glide-XP	1.98	1.98	6.26
5RGZ-UH1	Glide-XP	1.32	1.56	2.55
7AOL-RQH	Glide-XP	6.93	10.54	8.39
7LMD-Y6A	Glide-XP	0.71	0.71	1.33
7M8N-YSP	Glide-XP	1.60	1.95	1.71
7M90-YTS	Glide-XP	0.45	1.39	1.06
7AXM-93J	Glide-XP	5.21	5.38	5.44
5RF7-T67	Glide-XP	0.72	6.19	2.42
5RGS-S7V	Glide-XP	7.27	12.15	10.55
5RGI-U0P	Glide-XP	1.71	1.71	1.87
7AWU-S8B	Glide-XP	7.68	12.08	9.88
5RGW-UGM	Glide-XP	1.71	1.71	3.94
7LDL-XV4	Glide-XP	3.16	3.30	3.40
7M8M-YSG	Glide-XP	0.49	1.03	0.76
7AMJ-RMZ	Glide-XP	2.14	2.19	4.48
7MPB-ASC	Glide-XP	3.58	3.68	3.69
5REE-T1M	Glide-XP	0.48	9.68	6.14
7AP6-RQN	Glide-XP	4.62	5.33	5.64
5RE6-O0S	Glide-XP	6.18	7.81	7.12
7M8X-YTJ	Glide-XP	1.78	2.01	3.38
5RGG-NZD	Glide-XP	7.71	8.77	8.49
5REB-T0Y	Glide-XP	4.71	4.71	5.75
6M2N-3WL	Glide-XP	0.26	0.36	1.51
5RGY-UGS	Glide-XP	3.48	9.22	5.84
5RF3-T5V	Glide-XP	1.43	9.46	5.45
5RH3-UHA	Glide-XP	0.76	0.77	4.01
5R82-RZS	Glide-XP	4.41	4.46	4.63
6YVF-A82	Glide-XP	1.19	1.19	1.69
5REA-JGP	Glide-XP	11.48	14.34	13.26
5RF0-T5D	Glide-XP	0.29	9.21	6.91
6W79-X77	Glide-XP	0.91	0.94	0.98
5RH8-UHM	Glide-XP	5.79	6.15	5.97
7AWR-S7W	Glide-XP	5.62	6.15	6.39
5RHD-US7	Glide-XP	0.61	0.79	3.16
7KVL-X4P	Glide-XP	7.62	8.32	7.97
7LMF-Y6G	Glide-XP	0.90	0.90	1.53
7N44-06I	Glide-XP	0.62	1.19	1.06
5RG1-T9J	Glide-XP	2.23	6.35	4.31
5RF5-HV2	Glide-XP	1.22	1.22	1.24
5RFD-T6J	Glide-XP	13.56	13.60	14.02
5REI-T1S	Glide-XP	7.50	8.37	8.35
5R7Z-HWH	Glide-XP	3.54	5.75	4.28
5RF1-T5G	Glide-XP	4.74	4.74	4.74
7ANS-RNW	Glide-XP	2.81	2.81	3.21
7KX5-X7V	Glide-XP	5.79	7.70	7.39
7LFE-XWS	Glide-XP	2.32	2.32	2.50
5REH-AWP	Glide-XP	7.51	8.09	7.87
5RE5-T0J	Glide-XP	4.88	5.76	6.81
5RGQ-U1V	Glide-XP	2.46	2.46	6.11
7NT3-UQZ	Glide-XP	3.44	3.59	3.81
7NUK-USH	Glide-XP	2.55	6.68	4.50
6W63-X77	Glide-XP	5.91	6.01	6.01
5RGK-U0V	Glide-XP	7.35	9.24	8.49
5RF2-HVB	Glide-XP	2.54	8.51	6.58
7M8Y-YTM	Glide-XP	0.64	1.32	1.12
5RF6-NTG	Glide-XP	1.74	4.74	4.17
7M8P-YSJ	Glide-XP	0.53	1.26	0.93
7L13-XF7	Glide-XP	0.59	1.27	0.93
7L12-XF4	Glide-XP	0.67	0.67	1.00
7CA8-FNO	Glide-XP	3.78	3.79	4.67
5RGX-UGP	Glide-XP	2.08	7.35	4.72
5RH2-UH7	Glide-XP	0.69	0.69	5.31
5R81-RZJ	Glide-XP	2.67	2.67	2.68
7L0D-0EN	Glide-XP	4.66	4.81	4.78
5REG-LWA	Glide-XP	7.66	9.64	9.49
7AXO-QCP	Glide-XP	6.98	7.18	7.20
5R80-RZG	Glide-XP	2.46	2.46	4.26
7KW5-X4Y	Glide-XP	4.66	5.14	5.42
5RE4-SZY	Glide-XP	0.80	0.80	3.93
5REZ-T54	Glide-XP	0.87	1.48	1.70
5RED-JJG	Glide-XP	9.67	13.25	11.26
5R83-K0G	Glide-XP	1.17	1.17	3.09
5RGV-UGG	Glide-XP	2.53	4.25	3.95
5RFE-JGG	Glide-XP	6.35	7.57	7.16
5RF8-SFY	Glide-XP	7.57	7.87	8.49
5RE7-T0S	Glide-XP	7.60	7.60	7.81
5RF9-S7D	Glide-XP	1.98	1.98	4.63
5RE8-T0V	Glide-XP	7.25	11.45	10.50
7B83-PK8	Glide-XP	3.56	4.98	5.09
5RFA-JGY	Glide-XP	0.82	0.82	0.82
5REF-6SU	Glide-XP	7.83	8.20	8.11
5RFC-K1Y	Glide-XP	0.87	4.02	3.81
7L11-XF1	Glide-XP	0.49	0.49	1.41
7M8Z-YTV	Glide-XP	1.45	1.45	1.60
7L5D-XNJ	Glide-XP	1.23	2.28	1.90
7N8C-YD1	Glide-XP	8.24	8.42	8.35
5RGU-UGD	Glide-XP	1.53	1.66	3.57
7S3S-860	Glide-XP	0.39	0.39	0.77
7S3K-Z26	Glide-XP	0.66	0.66	1.91
5RH1-UGV	Glide-XP	1.86	1.86	3.65
7KVR-X4V	Glide-XP	9.47	13.08	11.59
5R7Y-JFM	Glide-XP	5.66	6.63	6.14
7AF0-R9W	Glide-XP	8.93	9.78	9.44
7KVL-X4P	PLANTS-chemplp	6.92	6.92	8.44
7ANS-RNW	PLANTS-chemplp	0.91	0.91	4.05
5RHD-US7	PLANTS-chemplp	0.37	0.37	7.68
6W79-X77	PLANTS-chemplp	0.76	0.76	5.06
5R84-GWS	PLANTS-chemplp	0.17	0.17	3.50
5RGZ-UH1	PLANTS-chemplp	1.24	1.24	3.70
7LMF-Y6G	PLANTS-chemplp	0.99	0.99	4.67
5RGX-UGP	PLANTS-chemplp	0.31	0.31	5.05
7AWR-S7W	PLANTS-chemplp	5.68	5.68	8.86
5RF1-T5G	PLANTS-chemplp	0.54	0.54	4.02
5R7Z-HWH	PLANTS-chemplp	1.50	5.46	3.92
7KVR-X4V	PLANTS-chemplp	9.87	12.59	11.77
5REA-JGP	PLANTS-chemplp	10.28	11.80	11.78
5RH8-UHM	PLANTS-chemplp	5.98	5.98	6.52
5RFE-JGG	PLANTS-chemplp	5.02	5.02	7.94
7KX5-X7V	PLANTS-chemplp	0.87	2.16	5.08
7AOL-RQH	PLANTS-chemplp	9.50	11.05	10.46
5REI-T1S	PLANTS-chemplp	3.99	4.98	6.71
5R83-K0G	PLANTS-chemplp	0.50	0.50	4.12
5RGW-UGM	PLANTS-chemplp	0.46	7.37	5.39
5RF0-T5D	PLANTS-chemplp	1.37	1.37	5.20
5RFB-K3S	PLANTS-chemplp	7.04	12.63	10.04
5REH-AWP	PLANTS-chemplp	5.27	5.27	7.12
5RF5-HV2	PLANTS-chemplp	8.11	8.70	9.28
6YVF-A82	PLANTS-chemplp	2.42	2.42	7.02
7M8N-YSP	PLANTS-chemplp	1.32	1.32	3.54
7L14-XFD	PLANTS-chemplp	0.27	0.27	5.00
5RE4-SZY	PLANTS-chemplp	0.57	0.57	7.00
5RED-JJG	PLANTS-chemplp	5.51	11.04	7.85
7N44-06I	PLANTS-chemplp	1.16	1.16	5.97
7LFE-XWS	PLANTS-chemplp	0.31	8.97	3.96
5RF4-T5Y	PLANTS-chemplp	10.56	10.60	11.40
7M8M-YSG	PLANTS-chemplp	0.30	0.30	5.43
7LTJ-YD1	PLANTS-chemplp	1.60	1.60	5.34
7M8O-YSM	PLANTS-chemplp	0.39	0.39	6.99
5RGV-UGG	PLANTS-chemplp	0.82	0.82	4.25
5RE8-T0V	PLANTS-chemplp	7.96	10.36	10.16
5RFC-K1Y	PLANTS-chemplp	3.28	12.68	6.40
5RF9-S7D	PLANTS-chemplp	1.11	5.91	3.74
5REF-6SU	PLANTS-chemplp	2.05	12.59	6.58
7M91-YU4	PLANTS-chemplp	0.49	0.49	5.52
7LME-Y6J	PLANTS-chemplp	2.12	8.16	5.33
7LDX-R9V	PLANTS-chemplp	6.94	8.12	9.15
5RE7-T0S	PLANTS-chemplp	5.39	5.39	10.11
5RH0-UH4	PLANTS-chemplp	6.29	7.02	6.66
7AWW-CLU	PLANTS-chemplp	9.95	11.78	11.26
5RGU-UGD	PLANTS-chemplp	0.91	7.48	5.64
7AQE-RV5	PLANTS-chemplp	5.79	7.11	8.32
7LFP-XY4	PLANTS-chemplp	1.51	1.51	4.78
7S3K-Z26	PLANTS-chemplp	0.54	0.54	4.88
7L10-XEY	PLANTS-chemplp	0.26	0.26	4.07
7JU7-G65	PLANTS-chemplp	0.97	0.97	7.49
7NT3-UQZ	PLANTS-chemplp	2.19	4.52	3.53
5R81-RZJ	PLANTS-chemplp	1.15	1.15	3.84
7S3S-860	PLANTS-chemplp	0.78	0.78	5.65
5RFA-JGY	PLANTS-chemplp	0.29	6.53	5.80
5RH3-UHA	PLANTS-chemplp	0.43	0.43	3.90
5R7Y-JFM	PLANTS-chemplp	4.55	4.55	6.59
5RF8-SFY	PLANTS-chemplp	12.39	12.39	12.98
5RH2-UH7	PLANTS-chemplp	0.39	0.39	3.23
5RFD-T6J	PLANTS-chemplp	10.17	12.11	12.10
7AMJ-RMZ	PLANTS-chemplp	3.61	10.25	9.41
7S4B-87H	PLANTS-chemplp	2.52	2.52	4.51
7AGA-LZE	PLANTS-chemplp	1.36	8.17	6.56
5RGQ-U1V	PLANTS-chemplp	1.27	4.78	3.34
5R82-RZS	PLANTS-chemplp	0.44	4.78	5.42
7AF0-R9W	PLANTS-chemplp	9.91	10.27	10.33
5REE-T1M	PLANTS-chemplp	1.44	11.33	6.47
6W63-X77	PLANTS-chemplp	1.25	1.25	5.18
5RE6-O0S	PLANTS-chemplp	6.13	6.62	8.57
7L0D-0EN	PLANTS-chemplp	1.26	1.26	4.61
7AQI-QEL	PLANTS-chemplp	4.20	9.21	8.97
5RGY-UGS	PLANTS-chemplp	1.82	2.25	5.56
5RF6-NTG	PLANTS-chemplp	1.53	1.53	4.93
5RGJ-U0S	PLANTS-chemplp	5.06	6.21	8.23
7AP6-RQN	PLANTS-chemplp	4.28	4.92	5.87
7AXO-QCP	PLANTS-chemplp	6.89	6.89	9.08
5RGH-U0M	PLANTS-chemplp	5.69	8.22	7.26
7AWU-S8B	PLANTS-chemplp	6.89	6.91	7.85
7M8Y-YTM	PLANTS-chemplp	0.46	0.46	6.57
7L13-XF7	PLANTS-chemplp	1.17	1.17	5.21
7ABU-R6Q	PLANTS-chemplp	10.49	13.15	11.97
7MPB-ASC	PLANTS-chemplp	1.13	4.09	3.31
5RF7-T67	PLANTS-chemplp	1.33	1.33	4.40
7A1U-FUA	PLANTS-chemplp	5.26	7.62	7.37
5RGI-U0P	PLANTS-chemplp	0.35	0.35	4.07
7L12-XF4	PLANTS-chemplp	0.52	0.52	5.75
5RH1-UGV	PLANTS-chemplp	3.16	3.16	5.34
5RH4-UHG	PLANTS-chemplp	3.15	6.32	5.94
7L5D-XNJ	PLANTS-chemplp	7.23	9.70	9.09
7M90-YTS	PLANTS-chemplp	0.92	4.90	5.58
5REG-LWA	PLANTS-chemplp	1.39	1.97	7.02
7M8P-YSJ	PLANTS-chemplp	0.41	0.41	5.39
5REC-T1J	PLANTS-chemplp	6.11	6.11	7.96
7LDL-XV4	PLANTS-chemplp	0.71	0.71	2.57
7L11-XF1	PLANTS-chemplp	0.25	0.25	5.27
5RE9-LPZ	PLANTS-chemplp	6.94	6.94	8.84
7AVD-S1W	PLANTS-chemplp	5.47	7.31	7.07
7N8C-YD1	PLANTS-chemplp	0.40	0.40	3.55
5RGS-S7V	PLANTS-chemplp	6.43	6.65	8.01
7M8Z-YTV	PLANTS-chemplp	0.71	0.71	5.47
5RF2-HVB	PLANTS-chemplp	8.02	13.12	11.18
5RG1-T9J	PLANTS-chemplp	2.80	6.90	5.67
5REZ-T54	PLANTS-chemplp	2.02	4.83	3.85
5R80-RZG	PLANTS-chemplp	0.52	0.52	4.48
7CA8-FNO	PLANTS-chemplp	4.41	5.80	6.87
5REB-T0Y	PLANTS-chemplp	5.89	8.00	8.15
5RF3-T5V	PLANTS-chemplp	0.79	0.79	5.31
5RE5-T0J	PLANTS-chemplp	7.35	11.59	8.77
7LMD-Y6A	PLANTS-chemplp	0.36	0.36	5.53
7AXM-93J	PLANTS-chemplp	5.24	5.24	8.19
6M2N-3WL	PLANTS-chemplp	1.93	1.93	4.84
7M8X-YTJ	PLANTS-chemplp	0.90	0.90	6.48
7B83-PK8	PLANTS-chemplp	5.56	7.02	7.71
7NUK-USH	PLANTS-chemplp	4.50	7.93	6.53
7KW5-X4Y	PLANTS-chemplp	8.00	10.03	9.64
7P51-5P9	PLANTS-chemplp	0.40	0.40	5.45
5RGK-U0V	PLANTS-chemplp	7.99	9.84	9.09
5RGG-NZD	PLANTS-chemplp	4.99	12.44	10.03
7LFP-XY4	PLANTS-plp	1.65	1.65	5.32
5REZ-T54	PLANTS-plp	2.00	4.21	3.86
5RE4-SZY	PLANTS-plp	1.02	7.40	6.14
5RGI-U0P	PLANTS-plp	1.39	5.84	4.65
7M8N-YSP	PLANTS-plp	1.44	1.44	6.45
5RE9-LPZ	PLANTS-plp	6.47	6.95	6.93
5RGZ-UH1	PLANTS-plp	0.48	0.48	4.29
7AXO-QCP	PLANTS-plp	6.89	6.89	8.27
7M8O-YSM	PLANTS-plp	1.10	1.10	7.32
5RE7-T0S	PLANTS-plp	3.61	3.61	8.41
7LMD-Y6A	PLANTS-plp	1.19	7.25	5.76
5R84-GWS	PLANTS-plp	0.85	6.85	3.63
5RF9-S7D	PLANTS-plp	1.04	5.92	3.67
5R7Y-JFM	PLANTS-plp	4.47	4.47	6.97
7L5D-XNJ	PLANTS-plp	2.03	9.01	8.06
7LME-Y6J	PLANTS-plp	1.91	8.20	5.91
7AOL-RQH	PLANTS-plp	9.30	11.12	10.45
7AXM-93J	PLANTS-plp	5.62	5.62	8.45
7M90-YTS	PLANTS-plp	1.28	1.28	7.39
5R83-K0G	PLANTS-plp	1.50	6.65	5.07
7L0D-0EN	PLANTS-plp	1.15	1.15	5.10
7P51-5P9	PLANTS-plp	0.42	0.42	5.22
5RFE-JGG	PLANTS-plp	5.01	5.01	7.01
5RF7-T67	PLANTS-plp	1.27	1.27	4.66
5R80-RZG	PLANTS-plp	0.49	0.49	4.06
7KW5-X4Y	PLANTS-plp	4.88	10.00	8.75
5RGV-UGG	PLANTS-plp	0.61	2.63	4.49
5RGW-UGM	PLANTS-plp	6.84	7.79	7.63
7AGA-LZE	PLANTS-plp	7.31	8.25	8.98
7KVR-X4V	PLANTS-plp	9.88	9.88	11.61
5RED-JJG	PLANTS-plp	5.42	10.89	7.37
7LTJ-YD1	PLANTS-plp	0.24	0.24	3.14
7JU7-G65	PLANTS-plp	9.88	11.75	11.15
5RF8-SFY	PLANTS-plp	10.69	13.26	12.25
5REG-LWA	PLANTS-plp	2.09	2.09	9.11
7AWU-S8B	PLANTS-plp	7.17	7.93	8.18
5RGS-S7V	PLANTS-plp	6.63	6.63	8.35
5RF5-HV2	PLANTS-plp	2.93	2.93	8.14
7A1U-FUA	PLANTS-plp	3.56	7.49	6.19
5RH0-UH4	PLANTS-plp	1.22	7.36	5.73
6W63-X77	PLANTS-plp	1.23	1.23	5.91
5RGH-U0M	PLANTS-plp	5.70	8.22	7.26
5RGK-U0V	PLANTS-plp	8.00	9.81	8.96
7M8X-YTJ	PLANTS-plp	2.04	2.04	6.02
7N8C-YD1	PLANTS-plp	0.34	0.34	4.03
5RGG-NZD	PLANTS-plp	5.01	12.42	9.73
7NUK-USH	PLANTS-plp	6.67	7.97	7.36
5RE6-O0S	PLANTS-plp	5.47	8.94	7.69
5REB-T0Y	PLANTS-plp	5.49	6.50	8.11
7CA8-FNO	PLANTS-plp	3.21	9.02	6.44
5RFB-K3S	PLANTS-plp	7.18	8.21	10.20
5RF3-T5V	PLANTS-plp	0.89	0.89	4.88
5RGQ-U1V	PLANTS-plp	1.50	3.32	3.44
5RE5-T0J	PLANTS-plp	2.75	8.89	6.57
5RGY-UGS	PLANTS-plp	1.39	2.18	4.50
5RG1-T9J	PLANTS-plp	2.36	6.91	5.61
6M2N-3WL	PLANTS-plp	1.87	1.87	3.87
5REH-AWP	PLANTS-plp	5.65	5.65	8.35
5REE-T1M	PLANTS-plp	5.79	11.28	8.03
7AP6-RQN	PLANTS-plp	3.91	4.89	5.87
5RH1-UGV	PLANTS-plp	1.76	6.67	5.12
7L10-XEY	PLANTS-plp	0.28	0.28	3.77
7L12-XF4	PLANTS-plp	0.54	0.54	5.94
5REC-T1J	PLANTS-plp	6.19	10.57	7.50
7L11-XF1	PLANTS-plp	1.85	5.25	5.00
5RH4-UHG	PLANTS-plp	3.18	6.31	6.59
7AQI-QEL	PLANTS-plp	8.40	9.15	10.33
5RF2-HVB	PLANTS-plp	2.44	7.87	8.31
7ABU-R6Q	PLANTS-plp	6.73	10.07	10.71
7L13-XF7	PLANTS-plp	1.18	1.18	6.53
7M8P-YSJ	PLANTS-plp	0.42	0.42	5.99
7M8Z-YTV	PLANTS-plp	0.72	0.72	5.36
7MPB-ASC	PLANTS-plp	1.52	4.13	3.42
5RF6-NTG	PLANTS-plp	1.53	5.63	5.39
5RGJ-U0S	PLANTS-plp	4.32	6.23	7.89
7M8Y-YTM	PLANTS-plp	1.24	1.24	4.62
7LDL-XV4	PLANTS-plp	0.74	0.74	3.03
5R82-RZS	PLANTS-plp	4.79	4.79	8.61
7LFE-XWS	PLANTS-plp	1.13	8.96	4.72
6YVF-A82	PLANTS-plp	4.77	10.16	8.14
7AMJ-RMZ	PLANTS-plp	5.83	9.39	9.30
5R81-RZJ	PLANTS-plp	1.15	1.15	4.13
5RH3-UHA	PLANTS-plp	0.55	0.55	3.98
5RFC-K1Y	PLANTS-plp	4.41	4.41	6.83
7M8M-YSG	PLANTS-plp	0.50	0.50	4.60
7S4B-87H	PLANTS-plp	2.52	2.52	4.84
5RFA-JGY	PLANTS-plp	0.40	11.00	7.51
5RH2-UH7	PLANTS-plp	0.82	0.82	3.92
5REF-6SU	PLANTS-plp	1.97	12.58	6.07
5RGU-UGD	PLANTS-plp	0.75	0.75	5.21
7M91-YU4	PLANTS-plp	1.41	1.41	5.85
5RE8-T0V	PLANTS-plp	7.98	11.42	10.94
7AWW-CLU	PLANTS-plp	9.96	9.96	12.04
7AQE-RV5	PLANTS-plp	5.65	5.78	7.25
7B83-PK8	PLANTS-plp	6.66	6.99	8.89
7S3S-860	PLANTS-plp	0.82	0.82	6.23
5RF4-T5Y	PLANTS-plp	7.66	11.51	10.42
7N44-06I	PLANTS-plp	1.21	1.21	6.87
7KVL-X4P	PLANTS-plp	6.93	12.11	9.26
5RGX-UGP	PLANTS-plp	0.70	0.70	5.57
7S3K-Z26	PLANTS-plp	1.08	1.08	5.70
7KX5-X7V	PLANTS-plp	0.88	0.88	4.89
5REA-JGP	PLANTS-plp	9.07	13.23	11.58
5RF0-T5D	PLANTS-plp	1.39	1.39	4.16
5REI-T1S	PLANTS-plp	4.99	4.99	6.69
7AF0-R9W	PLANTS-plp	9.55	10.27	10.02
7ANS-RNW	PLANTS-plp	1.33	5.77	4.70
6W79-X77	PLANTS-plp	1.16	1.16	5.01
5RH8-UHM	PLANTS-plp	6.06	6.06	6.69
5R7Z-HWH	PLANTS-plp	0.57	5.51	3.95
5RHD-US7	PLANTS-plp	0.39	0.39	7.65
5RF1-T5G	PLANTS-plp	0.66	2.09	3.19
5RFD-T6J	PLANTS-plp	11.65	13.33	12.75
7AWR-S7W	PLANTS-plp	5.71	5.71	9.24
7LMF-Y6G	PLANTS-plp	1.93	1.93	4.85
7L14-XFD	PLANTS-plp	1.82	1.82	4.86
7NT3-UQZ	PLANTS-plp	2.57	3.57	3.79
7LDX-R9V	PLANTS-plp	7.62	9.26	9.33
7AVD-S1W	PLANTS-plp	5.76	7.26	6.58
