# Supplementary material for: Re-Exploring the Ability of Common Docking Programs to Correctly Reproduce the Binding Modes of Non-Covalent Inhibitors of SARS-CoV-2 Protease Mpro
Source: Pharmaceuticals (Basel). 2022 Jan 31;15(2):180. doi: 10.3390/ph15020180 (PMC8878732; doi:10.3390/ph15020180)
Supplement: Supplementary file 1 [file pharmaceuticals-15-00180-s001.zip › pharmaceuticals-1563251-suppl/Selfdocking_scenario2.csv]

Complex	scoring_function	RMSD_sorted	RMSD_scor_func	RMSD_average
5RGI-U0P	GOLD-asp	0.56	0.56	0.62
7LDL-XV4	GOLD-asp	3.76	3.76	7.48
5RH4-UHG	GOLD-asp	1.41	12.34	9.72
7A1U-FUA	GOLD-asp	6.53	6.84	7.05
7L10-XEY	GOLD-asp	1.55	1.55	1.79
5RGH-U0M	GOLD-asp	1.40	5.32	4.74
7AQI-QEL	GOLD-asp	8.46	9.12	8.89
7L14-XFD	GOLD-asp	0.94	1.71	3.27
5RFB-K3S	GOLD-asp	1.15	1.17	2.23
7LFP-XY4	GOLD-asp	1.25	1.41	1.63
5RFD-T6J	GOLD-asp	12.04	12.52	12.64
7AQE-RV5	GOLD-asp	3.21	3.33	4.53
5RF5-HV2	GOLD-asp	2.82	2.84	2.84
7P51-5P9	GOLD-asp	0.35	1.16	0.99
7KVR-X4V	GOLD-asp	10.96	12.63	11.94
7AVD-S1W	GOLD-asp	1.68	7.21	6.34
5RGU-UGD	GOLD-asp	1.15	1.34	3.86
5R7Y-JFM	GOLD-asp	0.87	4.87	2.96
7S3K-Z26	GOLD-asp	0.53	0.53	1.47
7S3S-860	GOLD-asp	0.27	0.27	0.40
5REC-T1J	GOLD-asp	7.33	7.75	7.56
7MPB-ASC	GOLD-asp	3.16	3.67	3.40
7ABU-R6Q	GOLD-asp	1.54	4.71	3.40
7AP6-RQN	GOLD-asp	3.94	7.65	5.72
7N44-06I	GOLD-asp	1.27	1.27	4.74
7AWR-S7W	GOLD-asp	0.67	5.22	3.29
7LMF-Y6G	GOLD-asp	1.39	5.78	4.12
6W79-X77	GOLD-asp	0.53	1.05	3.31
5RHD-US7	GOLD-asp	0.16	0.99	0.83
5REA-JGP	GOLD-asp	11.12	13.81	13.16
5RH8-UHM	GOLD-asp	0.80	6.57	2.20
5RF0-T5D	GOLD-asp	4.36	10.71	8.07
5R82-RZS	GOLD-asp	4.10	4.18	4.20
7AF0-R9W	GOLD-asp	10.58	10.58	10.89
6YVF-A82	GOLD-asp	1.49	1.51	6.74
5RG1-T9J	GOLD-asp	4.70	5.72	6.04
5REB-T0Y	GOLD-asp	0.96	1.28	1.22
5RF3-T5V	GOLD-asp	0.74	0.94	0.90
7M8X-YTJ	GOLD-asp	1.90	2.08	5.61
6M2N-3WL	GOLD-asp	2.71	6.49	5.07
5RGG-NZD	GOLD-asp	12.68	12.68	13.33
5REE-T1M	GOLD-asp	12.88	12.88	13.24
5RE6-O0S	GOLD-asp	6.11	7.66	6.82
5RGJ-U0S	GOLD-asp	9.41	11.00	10.28
5RGY-UGS	GOLD-asp	8.30	8.77	8.63
7KVL-X4P	GOLD-asp	7.96	8.30	11.27
7M8Z-YTV	GOLD-asp	0.81	0.81	6.07
7L12-XF4	GOLD-asp	0.29	0.52	1.42
5RFA-JGY	GOLD-asp	9.22	12.07	9.97
5RFC-K1Y	GOLD-asp	1.10	1.10	5.24
5RE8-T0V	GOLD-asp	12.32	13.83	13.67
5REF-6SU	GOLD-asp	5.71	7.03	6.37
5RE7-T0S	GOLD-asp	6.72	6.72	7.12
7B83-PK8	GOLD-asp	2.72	2.72	4.92
5RGV-UGG	GOLD-asp	0.60	0.60	0.71
5RF9-S7D	GOLD-asp	10.01	12.27	11.58
5RF8-SFY	GOLD-asp	9.24	10.76	10.27
5RED-JJG	GOLD-asp	8.16	8.59	8.93
5RFE-JGG	GOLD-asp	1.54	1.54	5.37
5RE4-SZY	GOLD-asp	0.77	0.77	3.82
5R83-K0G	GOLD-asp	0.46	0.63	0.88
5R80-RZG	GOLD-asp	6.61	6.66	6.68
5REZ-T54	GOLD-asp	0.41	0.49	0.83
7KW5-X4Y	GOLD-asp	7.93	7.93	8.32
7L0D-0EN	GOLD-asp	0.90	0.90	3.99
7AXO-QCP	GOLD-asp	0.94	0.99	1.36
5RE9-LPZ	GOLD-asp	5.25	5.55	5.43
5RH2-UH7	GOLD-asp	0.43	0.43	0.87
7NT3-UQZ	GOLD-asp	1.73	2.23	3.14
5R81-RZJ	GOLD-asp	1.09	2.92	2.54
5RF1-T5G	GOLD-asp	2.03	2.47	2.44
5RH1-UGV	GOLD-asp	1.11	1.50	1.48
7M8P-YSJ	GOLD-asp	0.56	0.56	1.40
7L11-XF1	GOLD-asp	1.71	1.71	3.11
7M8Y-YTM	GOLD-asp	1.02	1.02	3.85
7L13-XF7	GOLD-asp	1.24	1.24	5.33
5RF6-NTG	GOLD-asp	1.26	1.60	1.47
6W63-X77	GOLD-asp	5.37	5.49	5.52
5RF2-HVB	GOLD-asp	1.68	7.93	7.17
7NUK-USH	GOLD-asp	2.25	2.25	5.04
7N8C-YD1	GOLD-asp	0.21	0.23	0.31
5RGK-U0V	GOLD-asp	7.35	7.67	7.50
7CA8-FNO	GOLD-asp	4.95	5.50	5.47
7LFE-XWS	GOLD-asp	1.10	2.51	2.48
5RGQ-U1V	GOLD-asp	1.67	2.31	1.95
5REH-AWP	GOLD-asp	3.30	7.13	6.39
5REI-T1S	GOLD-asp	5.10	12.36	9.82
7KX5-X7V	GOLD-asp	4.34	4.34	5.58
5R7Z-HWH	GOLD-asp	5.31	5.31	6.41
7ANS-RNW	GOLD-asp	0.93	3.20	1.89
5RGX-UGP	GOLD-asp	0.50	0.50	1.93
5RE5-T0J	GOLD-asp	2.36	2.36	7.88
5RH3-UHA	GOLD-asp	0.38	0.42	0.81
5REG-LWA	GOLD-asp	1.14	1.14	3.63
7M8N-YSP	GOLD-asp	0.42	1.44	3.45
5RF4-T5Y	GOLD-asp	11.69	12.70	11.96
7LDX-R9V	GOLD-asp	6.93	6.93	7.14
7JU7-G65	GOLD-asp	2.07	2.07	7.71
7M91-YU4	GOLD-asp	0.59	0.74	3.54
7M90-YTS	GOLD-asp	0.97	0.97	4.64
7LMD-Y6A	GOLD-asp	0.70	0.70	5.88
7M8M-YSG	GOLD-asp	0.34	0.94	0.72
7AXM-93J	GOLD-asp	2.55	3.04	6.53
7AWU-S8B	GOLD-asp	7.01	7.75	7.31
7AGA-LZE	GOLD-asp	7.20	7.87	7.50
5RGS-S7V	GOLD-asp	13.90	14.08	14.00
5R84-GWS	GOLD-asp	0.50	0.55	0.78
7AMJ-RMZ	GOLD-asp	10.05	13.80	10.86
5RGZ-UH1	GOLD-asp	0.58	0.58	1.55
5RH0-UH4	GOLD-asp	0.84	2.91	4.09
7M8O-YSM	GOLD-asp	6.73	6.73	8.94
5RGW-UGM	GOLD-asp	0.91	7.35	4.25
7S4B-87H	GOLD-asp	0.14	0.14	0.98
7L5D-XNJ	GOLD-asp	6.25	9.90	8.71
7AOL-RQH	GOLD-asp	14.25	14.25	15.25
7LTJ-YD1	GOLD-asp	0.19	0.22	0.26
5RF7-T67	GOLD-asp	0.40	0.58	0.65
7LME-Y6J	GOLD-asp	7.88	8.35	8.18
7AWW-CLU	GOLD-asp	12.72	13.06	12.94
6W63-X77	GOLD-chemscore	0.52	0.52	5.04
7L12-XF4	GOLD-chemscore	0.94	1.30	7.58
5RH1-UGV	GOLD-chemscore	1.47	1.47	1.75
5RGZ-UH1	GOLD-chemscore	0.43	0.43	4.98
7M8Y-YTM	GOLD-chemscore	1.39	1.60	5.91
5R84-GWS	GOLD-chemscore	0.32	0.81	0.76
7L11-XF1	GOLD-chemscore	1.60	1.96	1.80
7M8P-YSJ	GOLD-chemscore	1.22	1.79	1.54
5RF6-NTG	GOLD-chemscore	0.52	1.36	1.06
7AOL-RQH	GOLD-chemscore	14.94	15.38	15.20
7L13-XF7	GOLD-chemscore	1.36	1.72	5.43
7S3K-Z26	GOLD-chemscore	0.56	0.56	2.36
7M8Z-YTV	GOLD-chemscore	1.39	1.39	1.59
5RGH-U0M	GOLD-chemscore	2.13	2.13	3.27
7AQI-QEL	GOLD-chemscore	8.74	9.70	9.77
5RFB-K3S	GOLD-chemscore	12.78	12.97	13.32
5RFD-T6J	GOLD-chemscore	9.35	14.76	13.08
7M8O-YSM	GOLD-chemscore	1.62	1.62	4.72
7LFP-XY4	GOLD-chemscore	1.78	1.78	1.84
7AQE-RV5	GOLD-chemscore	11.68	12.05	12.07
7LTJ-YD1	GOLD-chemscore	0.15	0.15	0.27
5RF5-HV2	GOLD-chemscore	10.24	10.62	11.54
7P51-5P9	GOLD-chemscore	0.48	0.48	3.35
7KVR-X4V	GOLD-chemscore	12.37	12.72	12.58
7AVD-S1W	GOLD-chemscore	5.57	8.65	6.86
5R7Y-JFM	GOLD-chemscore	3.82	3.82	4.42
5RGU-UGD	GOLD-chemscore	1.32	8.38	6.69
7JU7-G65	GOLD-chemscore	9.34	9.90	11.01
7S3S-860	GOLD-chemscore	0.35	0.35	3.06
7AGA-LZE	GOLD-chemscore	11.62	14.62	12.37
5RF2-HVB	GOLD-chemscore	0.72	1.22	0.88
7AF0-R9W	GOLD-chemscore	11.00	11.03	11.62
7N8C-YD1	GOLD-chemscore	0.18	0.28	0.49
7NUK-USH	GOLD-chemscore	1.80	1.80	3.39
5RH3-UHA	GOLD-chemscore	0.41	0.45	0.52
5RGW-UGM	GOLD-chemscore	2.69	2.69	7.16
5RE7-T0S	GOLD-chemscore	12.51	13.45	13.44
5RF9-S7D	GOLD-chemscore	11.88	12.43	12.33
5RGV-UGG	GOLD-chemscore	0.73	0.88	0.83
5RF8-SFY	GOLD-chemscore	9.15	9.17	9.51
7AWU-S8B	GOLD-chemscore	6.61	7.00	7.25
5RF7-T67	GOLD-chemscore	0.49	0.66	0.61
5RED-JJG	GOLD-chemscore	10.51	11.91	11.60
5RFE-JGG	GOLD-chemscore	6.81	12.10	10.73
5R83-K0G	GOLD-chemscore	0.61	0.61	0.78
5RE4-SZY	GOLD-chemscore	4.88	4.92	4.90
5REZ-T54	GOLD-chemscore	0.90	0.92	1.20
7L5D-XNJ	GOLD-chemscore	7.64	7.64	8.90
5R80-RZG	GOLD-chemscore	7.09	7.90	7.81
7KW5-X4Y	GOLD-chemscore	8.01	8.55	8.36
7L0D-0EN	GOLD-chemscore	0.47	1.56	1.78
7AXO-QCP	GOLD-chemscore	0.53	0.90	0.73
5RGI-U0P	GOLD-chemscore	0.38	0.43	0.54
5RE9-LPZ	GOLD-chemscore	3.03	4.14	4.68
5REG-LWA	GOLD-chemscore	9.57	9.57	12.28
7B83-PK8	GOLD-chemscore	4.69	4.69	5.78
5REF-6SU	GOLD-chemscore	5.68	5.98	5.94
5RE8-T0V	GOLD-chemscore	12.71	13.71	13.39
5RGS-S7V	GOLD-chemscore	13.92	15.68	14.49
7CA8-FNO	GOLD-chemscore	5.57	7.83	7.16
5RE5-T0J	GOLD-chemscore	8.75	8.75	11.76
5RGQ-U1V	GOLD-chemscore	2.24	4.74	4.27
7M8N-YSP	GOLD-chemscore	1.25	1.25	3.43
7LFE-XWS	GOLD-chemscore	2.28	4.50	3.86
5REH-AWP	GOLD-chemscore	7.47	7.96	9.35
5REI-T1S	GOLD-chemscore	14.79	16.40	15.81
7KX5-X7V	GOLD-chemscore	5.67	6.45	6.25
7LMD-Y6A	GOLD-chemscore	1.54	2.04	2.00
5RGK-U0V	GOLD-chemscore	6.76	6.76	8.25
5R7Z-HWH	GOLD-chemscore	2.49	5.96	4.21
5RF1-T5G	GOLD-chemscore	0.92	0.92	2.36
5RGX-UGP	GOLD-chemscore	6.24	7.49	7.03
7AXM-93J	GOLD-chemscore	5.42	8.84	7.99
7NT3-UQZ	GOLD-chemscore	2.27	3.17	4.61
5R81-RZJ	GOLD-chemscore	0.61	0.69	0.82
5RH2-UH7	GOLD-chemscore	0.31	0.41	4.00
5RFA-JGY	GOLD-chemscore	10.00	11.04	10.76
5RFC-K1Y	GOLD-chemscore	6.55	7.67	7.40
7M90-YTS	GOLD-chemscore	1.72	1.88	2.13
7ANS-RNW	GOLD-chemscore	1.11	2.62	2.82
7LME-Y6J	GOLD-chemscore	2.32	2.32	6.82
7L14-XFD	GOLD-chemscore	1.70	1.77	1.76
7S4B-87H	GOLD-chemscore	2.29	2.29	3.48
5RH0-UH4	GOLD-chemscore	6.76	6.92	6.86
7AP6-RQN	GOLD-chemscore	7.50	7.50	8.96
5RHD-US7	GOLD-chemscore	0.52	0.59	0.68
6W79-X77	GOLD-chemscore	6.53	6.75	6.95
7LDL-XV4	GOLD-chemscore	4.53	4.53	6.68
5REE-T1M	GOLD-chemscore	0.50	13.82	8.33
5RG1-T9J	GOLD-chemscore	3.31	3.31	4.13
5RGY-UGS	GOLD-chemscore	0.97	8.59	5.67
5RF4-T5Y	GOLD-chemscore	6.11	6.60	6.65
5REC-T1J	GOLD-chemscore	4.63	4.70	5.28
5RE6-O0S	GOLD-chemscore	6.18	6.18	8.42
6YVF-A82	GOLD-chemscore	3.70	4.59	4.75
7ABU-R6Q	GOLD-chemscore	9.35	12.17	10.26
7MPB-ASC	GOLD-chemscore	2.85	3.00	3.13
7LDX-R9V	GOLD-chemscore	6.94	11.70	8.01
6M2N-3WL	GOLD-chemscore	3.84	4.41	4.34
5REA-JGP	GOLD-chemscore	11.98	13.48	13.19
5R82-RZS	GOLD-chemscore	7.73	7.73	11.07
5RF0-T5D	GOLD-chemscore	12.55	14.17	13.61
7M8M-YSG	GOLD-chemscore	0.37	0.37	1.09
5RH8-UHM	GOLD-chemscore	5.62	6.33	6.05
7LMF-Y6G	GOLD-chemscore	1.63	1.63	6.24
5RGJ-U0S	GOLD-chemscore	10.39	11.22	11.07
7N44-06I	GOLD-chemscore	0.48	0.73	0.92
5REB-T0Y	GOLD-chemscore	1.28	1.28	4.43
5RF3-T5V	GOLD-chemscore	8.68	8.68	9.31
7AWR-S7W	GOLD-chemscore	5.06	11.33	8.23
7A1U-FUA	GOLD-chemscore	6.78	8.17	7.89
7AMJ-RMZ	GOLD-chemscore	9.69	9.96	10.02
5RH4-UHG	GOLD-chemscore	2.02	2.02	12.34
7M8X-YTJ	GOLD-chemscore	1.21	1.21	5.33
7KVL-X4P	GOLD-chemscore	13.39	13.64	13.78
5RGG-NZD	GOLD-chemscore	13.31	13.36	13.41
7AWW-CLU	GOLD-chemscore	13.10	16.43	14.88
7M91-YU4	GOLD-chemscore	0.70	1.30	2.86
7L10-XEY	GOLD-chemscore	1.72	1.92	2.55
5RGQ-U1V	GOLD-goldscore	4.64	4.64	4.68
7AXM-93J	GOLD-goldscore	7.48	7.71	7.97
7NT3-UQZ	GOLD-goldscore	1.84	2.34	2.15
6M2N-3WL	GOLD-goldscore	2.21	2.35	2.32
5RE5-T0J	GOLD-goldscore	13.28	13.86	13.67
5RGX-UGP	GOLD-goldscore	0.33	0.43	0.39
5R81-RZJ	GOLD-goldscore	1.26	1.43	1.43
6YVF-A82	GOLD-goldscore	1.19	1.24	3.45
5RH2-UH7	GOLD-goldscore	0.33	0.39	0.40
5RF3-T5V	GOLD-goldscore	2.28	2.28	2.29
5RF4-T5Y	GOLD-goldscore	12.64	12.68	12.70
5R82-RZS	GOLD-goldscore	4.26	4.31	4.38
5REH-AWP	GOLD-goldscore	8.07	8.07	8.12
5RG1-T9J	GOLD-goldscore	2.84	3.99	4.37
5RF1-T5G	GOLD-goldscore	1.94	2.39	2.29
5R7Z-HWH	GOLD-goldscore	6.16	6.38	6.36
7LFE-XWS	GOLD-goldscore	1.30	4.88	4.08
7LMD-Y6A	GOLD-goldscore	0.90	0.90	2.22
5RGY-UGS	GOLD-goldscore	7.92	7.98	8.01
7ANS-RNW	GOLD-goldscore	0.77	1.17	1.58
7M8N-YSP	GOLD-goldscore	6.44	9.31	8.07
5REI-T1S	GOLD-goldscore	3.05	3.35	4.27
7KX5-X7V	GOLD-goldscore	5.77	5.77	6.42
7AQI-QEL	GOLD-goldscore	5.47	15.52	8.60
5REB-T0Y	GOLD-goldscore	1.05	1.59	1.31
7M8M-YSG	GOLD-goldscore	0.41	0.60	0.69
5RFC-K1Y	GOLD-goldscore	1.05	4.29	3.64
7AWU-S8B	GOLD-goldscore	7.49	7.80	7.73
5RE4-SZY	GOLD-goldscore	0.73	0.82	0.77
5REZ-T54	GOLD-goldscore	1.29	1.53	1.46
7LMF-Y6G	GOLD-goldscore	0.92	0.92	1.33
7KW5-X4Y	GOLD-goldscore	2.17	9.00	9.93
5R80-RZG	GOLD-goldscore	2.43	2.58	2.56
7KVL-X4P	GOLD-goldscore	11.92	13.48	12.80
5RGI-U0P	GOLD-goldscore	0.42	0.43	0.43
7AXO-QCP	GOLD-goldscore	0.90	0.98	0.99
7L0D-0EN	GOLD-goldscore	1.18	1.25	1.28
7N44-06I	GOLD-goldscore	0.45	0.51	1.56
5REG-LWA	GOLD-goldscore	0.53	0.88	0.78
7L5D-XNJ	GOLD-goldscore	0.98	0.98	7.37
5RH3-UHA	GOLD-goldscore	0.45	0.45	0.60
7AMJ-RMZ	GOLD-goldscore	5.31	10.38	7.38
7AWR-S7W	GOLD-goldscore	2.69	5.28	4.94
5R83-K0G	GOLD-goldscore	0.99	1.04	3.23
5RED-JJG	GOLD-goldscore	4.37	6.15	5.56
5RHD-US7	GOLD-goldscore	0.60	0.61	0.76
5RFA-JGY	GOLD-goldscore	0.27	0.30	0.35
5REA-JGP	GOLD-goldscore	8.60	8.60	10.42
5REF-6SU	GOLD-goldscore	1.64	1.92	1.75
5RF0-T5D	GOLD-goldscore	0.21	0.24	0.29
5RE8-T0V	GOLD-goldscore	12.61	14.28	13.39
7S4B-87H	GOLD-goldscore	0.52	0.55	0.94
7B83-PK8	GOLD-goldscore	7.17	7.99	7.83
7M90-YTS	GOLD-goldscore	0.46	0.46	1.65
5RGS-S7V	GOLD-goldscore	13.97	14.13	14.17
5RF9-S7D	GOLD-goldscore	1.12	1.12	9.00
5RH8-UHM	GOLD-goldscore	1.48	6.38	3.52
6W79-X77	GOLD-goldscore	0.59	0.87	0.76
5RF7-T67	GOLD-goldscore	0.39	0.50	0.48
5RF8-SFY	GOLD-goldscore	9.07	13.01	12.84
5RGV-UGG	GOLD-goldscore	0.56	0.68	0.78
5RFE-JGG	GOLD-goldscore	6.67	6.77	6.94
5RE7-T0S	GOLD-goldscore	10.32	12.06	10.84
7AOL-RQH	GOLD-goldscore	13.20	14.00	13.81
7N8C-YD1	GOLD-goldscore	0.45	0.45	0.54
7S3K-Z26	GOLD-goldscore	0.61	0.61	0.65
5REE-T1M	GOLD-goldscore	0.74	12.76	8.08
7AQE-RV5	GOLD-goldscore	4.81	5.52	5.40
7L11-XF1	GOLD-goldscore	0.41	0.41	0.49
7JU7-G65	GOLD-goldscore	0.94	0.94	6.30
7L12-XF4	GOLD-goldscore	1.25	1.29	2.06
7LFP-XY4	GOLD-goldscore	1.05	1.16	1.17
7AWW-CLU	GOLD-goldscore	10.03	15.50	14.65
5R84-GWS	GOLD-goldscore	0.36	0.36	0.44
5REC-T1J	GOLD-goldscore	4.66	4.66	7.11
5RH1-UGV	GOLD-goldscore	0.77	6.63	3.22
7M8Z-YTV	GOLD-goldscore	0.77	0.93	1.79
5RH4-UHG	GOLD-goldscore	1.16	1.66	1.48
5RGJ-U0S	GOLD-goldscore	11.65	11.65	12.64
7P51-5P9	GOLD-goldscore	0.48	0.66	0.54
7AGA-LZE	GOLD-goldscore	7.04	7.13	8.51
7MPB-ASC	GOLD-goldscore	3.52	4.23	3.96
5RF5-HV2	GOLD-goldscore	1.97	10.04	8.44
7CA8-FNO	GOLD-goldscore	2.91	3.03	2.99
7AF0-R9W	GOLD-goldscore	11.37	12.14	11.92
7S3S-860	GOLD-goldscore	0.37	0.48	0.48
7AVD-S1W	GOLD-goldscore	6.21	7.30	6.88
7LTJ-YD1	GOLD-goldscore	0.47	0.47	0.76
5RGU-UGD	GOLD-goldscore	0.92	0.98	1.13
5RH0-UH4	GOLD-goldscore	0.85	0.90	0.88
7ABU-R6Q	GOLD-goldscore	4.74	16.07	11.03
7LDL-XV4	GOLD-goldscore	0.59	0.59	0.70
7KVR-X4V	GOLD-goldscore	10.13	10.13	11.97
7LDX-R9V	GOLD-goldscore	0.44	1.02	0.82
7L10-XEY	GOLD-goldscore	0.39	0.39	0.43
7AP6-RQN	GOLD-goldscore	2.87	3.56	3.41
5R7Y-JFM	GOLD-goldscore	0.63	1.79	1.33
5RFB-K3S	GOLD-goldscore	12.26	12.34	12.36
7M8X-YTJ	GOLD-goldscore	0.45	0.45	0.88
5RF2-HVB	GOLD-goldscore	2.45	2.50	2.49
5RFD-T6J	GOLD-goldscore	15.06	16.17	16.05
5RGW-UGM	GOLD-goldscore	0.41	0.41	1.87
7M8O-YSM	GOLD-goldscore	0.82	0.82	2.04
5RGK-U0V	GOLD-goldscore	7.59	7.65	7.75
7M8Y-YTM	GOLD-goldscore	1.26	1.26	2.27
5RGG-NZD	GOLD-goldscore	13.38	13.44	13.49
5RGH-U0M	GOLD-goldscore	5.01	6.38	6.11
5RE9-LPZ	GOLD-goldscore	6.86	6.94	6.94
7A1U-FUA	GOLD-goldscore	7.02	7.11	7.10
7M8P-YSJ	GOLD-goldscore	0.64	0.64	3.30
7L13-XF7	GOLD-goldscore	0.45	1.23	0.89
7M91-YU4	GOLD-goldscore	0.79	0.79	0.91
7L14-XFD	GOLD-goldscore	0.47	0.51	2.31
5RF6-NTG	GOLD-goldscore	0.34	2.45	2.05
5RGZ-UH1	GOLD-goldscore	0.27	7.34	4.53
5RE6-O0S	GOLD-goldscore	4.82	4.82	5.62
7LME-Y6J	GOLD-goldscore	1.28	1.28	3.54
7NUK-USH	GOLD-goldscore	2.83	2.83	3.56
6W63-X77	GOLD-goldscore	0.47	0.92	2.79
5REG-LWA	GOLD-plp	1.70	1.71	4.70
7LDX-R9V	GOLD-plp	7.35	8.14	8.00
5RFE-JGG	GOLD-plp	6.31	6.31	8.08
5RHD-US7	GOLD-plp	0.47	0.47	0.49
7AVD-S1W	GOLD-plp	2.09	6.07	4.22
7LME-Y6J	GOLD-plp	2.17	2.17	6.62
5RFD-T6J	GOLD-plp	14.71	15.08	14.88
7AWU-S8B	GOLD-plp	6.60	6.73	6.87
7P51-5P9	GOLD-plp	0.47	0.47	0.87
5RFB-K3S	GOLD-plp	12.24	12.24	12.59
7L10-XEY	GOLD-plp	0.26	0.28	1.23
7AXO-QCP	GOLD-plp	0.52	0.55	3.36
7N44-06I	GOLD-plp	0.34	0.34	3.62
5RH4-UHG	GOLD-plp	14.48	14.85	15.13
7AQE-RV5	GOLD-plp	3.30	12.46	7.83
7L5D-XNJ	GOLD-plp	4.85	6.41	8.74
5REZ-T54	GOLD-plp	0.82	1.33	1.79
7LMF-Y6G	GOLD-plp	1.69	6.21	4.25
7KW5-X4Y	GOLD-plp	7.95	7.95	8.18
7LTJ-YD1	GOLD-plp	0.15	0.25	0.53
5R83-K0G	GOLD-plp	0.56	0.56	3.28
7CA8-FNO	GOLD-plp	4.09	5.90	6.55
5R7Y-JFM	GOLD-plp	4.32	4.53	4.66
5RF1-T5G	GOLD-plp	0.33	0.83	1.32
5RGZ-UH1	GOLD-plp	0.35	0.35	0.56
5RG1-T9J	GOLD-plp	4.39	5.19	4.90
7L13-XF7	GOLD-plp	1.43	1.46	3.71
7ANS-RNW	GOLD-plp	1.01	1.01	2.57
7AWW-CLU	GOLD-plp	11.33	15.74	13.35
5RF4-T5Y	GOLD-plp	11.71	11.76	12.11
7KX5-X7V	GOLD-plp	5.43	5.43	6.31
5RE6-O0S	GOLD-plp	6.40	6.45	8.03
5RF6-NTG	GOLD-plp	1.31	1.65	1.51
7M8N-YSP	GOLD-plp	1.19	1.19	4.34
5RF3-T5V	GOLD-plp	0.63	0.63	0.70
5REH-AWP	GOLD-plp	3.28	7.90	7.07
5RF2-HVB	GOLD-plp	2.50	2.50	2.52
5RGQ-U1V	GOLD-plp	1.43	1.68	2.34
7AOL-RQH	GOLD-plp	14.71	14.71	15.12
5RGK-U0V	GOLD-plp	4.25	9.81	6.13
6M2N-3WL	GOLD-plp	0.21	0.28	2.64
5RGG-NZD	GOLD-plp	13.53	13.57	13.66
7S4B-87H	GOLD-plp	1.19	2.63	3.20
7L11-XF1	GOLD-plp	1.64	1.85	1.80
6YVF-A82	GOLD-plp	1.07	1.45	2.13
7LDL-XV4	GOLD-plp	1.35	1.35	5.63
5RF9-S7D	GOLD-plp	5.99	5.99	11.14
5RH8-UHM	GOLD-plp	0.72	1.08	2.40
5RGS-S7V	GOLD-plp	11.84	13.96	13.11
7B83-PK8	GOLD-plp	10.68	11.72	11.47
7S3S-860	GOLD-plp	0.30	0.65	0.50
7MPB-ASC	GOLD-plp	3.33	4.14	3.59
5REF-6SU	GOLD-plp	4.02	6.26	5.68
7NT3-UQZ	GOLD-plp	1.91	3.88	4.10
7AF0-R9W	GOLD-plp	11.08	15.36	12.03
5RF0-T5D	GOLD-plp	0.49	0.71	1.16
5RFC-K1Y	GOLD-plp	6.41	6.72	7.56
5RH3-UHA	GOLD-plp	0.49	0.52	0.80
7N8C-YD1	GOLD-plp	0.21	0.26	0.54
5RH2-UH7	GOLD-plp	0.30	0.32	0.36
5RH1-UGV	GOLD-plp	1.52	1.76	1.73
7AP6-RQN	GOLD-plp	7.48	8.36	8.34
7AXM-93J	GOLD-plp	3.54	3.59	6.07
7AGA-LZE	GOLD-plp	7.34	9.33	8.94
7AQI-QEL	GOLD-plp	9.31	10.88	10.29
5RF8-SFY	GOLD-plp	8.91	9.22	11.91
7AMJ-RMZ	GOLD-plp	6.19	6.19	7.70
7M8X-YTJ	GOLD-plp	1.92	1.92	5.47
5RGW-UGM	GOLD-plp	2.33	7.33	4.30
7L14-XFD	GOLD-plp	1.71	1.83	1.75
5RGU-UGD	GOLD-plp	0.51	0.51	6.09
7NUK-USH	GOLD-plp	2.88	6.48	3.99
7M8M-YSG	GOLD-plp	0.30	0.41	0.55
7S3K-Z26	GOLD-plp	0.42	0.42	2.37
5R84-GWS	GOLD-plp	0.27	0.27	1.80
5RED-JJG	GOLD-plp	4.95	12.26	11.73
5REB-T0Y	GOLD-plp	1.09	1.59	1.59
7LFP-XY4	GOLD-plp	1.18	1.77	1.57
7L12-XF4	GOLD-plp	0.46	0.57	5.31
7JU7-G65	GOLD-plp	1.84	1.84	7.32
5RE5-T0J	GOLD-plp	13.12	13.12	13.50
5RE8-T0V	GOLD-plp	12.78	13.15	13.22
5RGV-UGG	GOLD-plp	0.56	0.65	0.61
7M91-YU4	GOLD-plp	0.50	0.50	1.04
5REI-T1S	GOLD-plp	2.73	3.58	3.47
5RGY-UGS	GOLD-plp	1.27	1.98	5.76
7A1U-FUA	GOLD-plp	7.21	8.64	8.09
5REA-JGP	GOLD-plp	11.76	12.81	12.45
7M8O-YSM	GOLD-plp	1.03	1.03	6.34
7LFE-XWS	GOLD-plp	3.53	4.82	4.30
5R82-RZS	GOLD-plp	4.23	4.23	8.40
5RE7-T0S	GOLD-plp	11.78	11.78	12.30
5RFA-JGY	GOLD-plp	9.06	9.11	9.21
7KVR-X4V	GOLD-plp	8.91	13.24	12.47
5RE4-SZY	GOLD-plp	0.46	0.47	0.47
5RGJ-U0S	GOLD-plp	9.01	11.28	9.54
5RGI-U0P	GOLD-plp	0.39	0.44	0.48
7KVL-X4P	GOLD-plp	13.31	13.42	13.38
5RE9-LPZ	GOLD-plp	5.16	5.70	5.53
7M8P-YSJ	GOLD-plp	0.40	1.45	2.48
7ABU-R6Q	GOLD-plp	5.85	12.07	8.72
5RGX-UGP	GOLD-plp	0.66	0.66	6.04
5RF7-T67	GOLD-plp	0.36	0.36	0.44
7AWR-S7W	GOLD-plp	3.76	3.76	6.93
5RGH-U0M	GOLD-plp	4.87	8.19	5.89
7M8Y-YTM	GOLD-plp	0.56	1.48	1.88
7L0D-0EN	GOLD-plp	1.04	1.14	4.24
5R7Z-HWH	GOLD-plp	3.22	3.22	4.08
5R81-RZJ	GOLD-plp	0.88	1.10	1.04
7M90-YTS	GOLD-plp	1.15	1.15	3.41
5RH0-UH4	GOLD-plp	6.69	6.86	6.85
5RF5-HV2	GOLD-plp	2.82	2.83	6.68
5REC-T1J	GOLD-plp	4.60	4.60	5.28
7LMD-Y6A	GOLD-plp	0.28	0.28	2.52
6W79-X77	GOLD-plp	6.66	6.66	7.64
6W63-X77	GOLD-plp	4.20	6.86	6.42
7M8Z-YTV	GOLD-plp	0.61	0.61	0.84
5R80-RZG	GOLD-plp	0.83	0.83	1.90
5REE-T1M	GOLD-plp	0.42	0.42	1.50
7AWR-S7W	Glide-SP	2.55	2.55	7.33
5RF0-T5D	Glide-SP	0.54	1.40	2.83
7M8Z-YTV	Glide-SP	0.72	1.06	0.96
5REI-T1S	Glide-SP	2.15	2.15	4.81
5RF1-T5G	Glide-SP	0.87	0.87	2.09
7LMF-Y6G	Glide-SP	1.00	1.00	3.05
6YVF-A82	Glide-SP	1.16	1.16	2.21
5REA-JGP	Glide-SP	11.24	11.24	11.93
7KX5-X7V	Glide-SP	6.16	6.60	6.84
5RH1-UGV	Glide-SP	0.92	0.98	2.55
5RHD-US7	Glide-SP	0.48	1.03	0.98
5R7Z-HWH	Glide-SP	1.00	6.80	4.71
7AQI-QEL	Glide-SP	8.64	8.64	9.38
7ANS-RNW	Glide-SP	1.12	1.12	2.31
5RH8-UHM	Glide-SP	1.29	1.39	1.63
5RGY-UGS	Glide-SP	0.88	8.75	4.67
5R82-RZS	Glide-SP	5.30	7.62	6.94
7LDL-XV4	Glide-SP	4.40	4.40	8.40
7M8P-YSJ	Glide-SP	0.51	0.51	1.91
5RGJ-U0S	Glide-SP	10.78	11.75	11.27
7MPB-ASC	Glide-SP	1.69	3.89	4.41
5RF6-NTG	Glide-SP	2.11	2.11	3.03
7M8Y-YTM	Glide-SP	0.79	0.79	1.99
5RH4-UHG	Glide-SP	1.93	2.16	2.48
7AP6-RQN	Glide-SP	4.27	4.27	6.14
7L12-XF4	Glide-SP	0.66	0.66	2.61
5RF2-HVB	Glide-SP	0.90	2.51	3.13
5REE-T1M	Glide-SP	0.47	0.47	2.41
5RE6-O0S	Glide-SP	5.15	6.87	7.08
6W63-X77	Glide-SP	0.72	0.72	5.04
7L11-XF1	Glide-SP	0.41	0.89	2.53
7LFE-XWS	Glide-SP	1.98	2.28	3.59
5RGK-U0V	Glide-SP	4.41	9.52	7.28
5RGG-NZD	Glide-SP	6.98	8.45	7.74
5REC-T1J	Glide-SP	4.57	6.71	5.98
5REB-T0Y	Glide-SP	4.24	4.72	5.71
7CA8-FNO	Glide-SP	5.58	5.58	5.83
6M2N-3WL	Glide-SP	0.41	2.82	3.92
7NUK-USH	Glide-SP	1.78	2.27	4.32
7NT3-UQZ	Glide-SP	4.33	6.88	5.27
5RGQ-U1V	Glide-SP	4.69	4.69	4.79
5RF3-T5V	Glide-SP	1.25	1.25	4.73
7L10-XEY	Glide-SP	0.66	1.02	2.91
5RE5-T0J	Glide-SP	2.00	2.00	4.76
5RG1-T9J	Glide-SP	0.38	2.93	2.05
7A1U-FUA	Glide-SP	0.78	1.13	1.20
5REH-AWP	Glide-SP	2.46	8.01	5.92
7M8X-YTJ	Glide-SP	1.77	1.94	5.92
7N8C-YD1	Glide-SP	0.97	1.62	3.09
6W79-X77	Glide-SP	0.91	0.91	5.54
5RGX-UGP	Glide-SP	1.65	1.65	4.94
5REZ-T54	Glide-SP	1.55	1.55	2.41
7AOL-RQH	Glide-SP	5.11	5.96	6.53
5RGW-UGM	Glide-SP	1.63	2.56	3.43
5RED-JJG	Glide-SP	9.34	12.57	11.13
5RGZ-UH1	Glide-SP	0.67	0.67	4.69
5R83-K0G	Glide-SP	3.10	3.10	5.10
7LFP-XY4	Glide-SP	0.98	1.28	2.13
7S3S-860	Glide-SP	0.50	0.50	5.44
7AGA-LZE	Glide-SP	7.98	8.00	8.76
5R84-GWS	Glide-SP	1.36	1.55	3.71
5RFE-JGG	Glide-SP	6.82	6.82	8.62
5RGV-UGG	Glide-SP	0.87	0.87	4.97
7AQE-RV5	Glide-SP	6.78	10.64	8.86
7KVL-X4P	Glide-SP	2.58	4.58	5.09
7L5D-XNJ	Glide-SP	0.94	0.94	2.82
5RE4-SZY	Glide-SP	0.82	2.28	2.22
7JU7-G65	Glide-SP	2.42	2.42	2.80
7LMD-Y6A	Glide-SP	0.75	0.75	2.85
7P51-5P9	Glide-SP	0.75	1.24	6.20
5RGI-U0P	Glide-SP	0.91	0.91	3.39
7AVD-S1W	Glide-SP	5.57	6.15	6.69
7AWU-S8B	Glide-SP	5.52	5.52	7.75
5REG-LWA	Glide-SP	1.54	1.54	3.67
7L0D-0EN	Glide-SP	4.28	4.28	4.28
5RF5-HV2	Glide-SP	0.83	2.45	1.88
5RGS-S7V	Glide-SP	2.03	7.06	5.04
5RF7-T67	Glide-SP	0.47	0.47	6.71
5R7Y-JFM	Glide-SP	5.00	9.32	8.96
7AXO-QCP	Glide-SP	0.78	0.78	5.44
7AXM-93J	Glide-SP	2.30	2.30	5.09
5R80-RZG	Glide-SP	1.75	2.46	3.52
7M90-YTS	Glide-SP	0.44	0.44	3.08
7KVR-X4V	Glide-SP	8.76	12.31	11.63
7KW5-X4Y	Glide-SP	2.71	5.15	5.30
7M8N-YSP	Glide-SP	1.55	1.73	2.88
5RF8-SFY	Glide-SP	8.31	10.55	10.11
7LTJ-YD1	Glide-SP	1.03	1.50	4.16
7M91-YU4	Glide-SP	0.47	0.83	3.31
5REF-6SU	Glide-SP	5.44	5.44	8.18
5RFA-JGY	Glide-SP	0.59	0.59	7.76
7S4B-87H	Glide-SP	0.45	0.45	4.42
7M8M-YSG	Glide-SP	0.56	0.56	2.73
5RFC-K1Y	Glide-SP	4.22	4.41	5.77
7S3K-Z26	Glide-SP	0.64	0.64	3.16
5RGU-UGD	Glide-SP	1.05	7.28	4.00
5RH3-UHA	Glide-SP	0.88	0.94	2.91
7L13-XF7	Glide-SP	0.53	0.53	5.47
7AMJ-RMZ	Glide-SP	4.24	10.02	8.55
5RH2-UH7	Glide-SP	0.67	0.67	4.69
5RGH-U0M	Glide-SP	5.17	5.17	5.79
5RFB-K3S	Glide-SP	4.16	4.16	5.20
7N44-06I	Glide-SP	0.53	0.53	1.81
5R81-RZJ	Glide-SP	1.03	1.28	1.55
5RF4-T5Y	Glide-SP	6.71	9.26	9.70
7ABU-R6Q	Glide-SP	8.28	10.38	9.85
7LDX-R9V	Glide-SP	0.33	1.34	1.74
7L14-XFD	Glide-SP	0.54	0.54	4.13
7M8O-YSM	Glide-SP	0.66	1.08	2.76
5RE9-LPZ	Glide-SP	5.58	6.64	6.65
5RH0-UH4	Glide-SP	4.99	6.85	6.28
5RE8-T0V	Glide-SP	10.06	10.58	10.56
5RF9-S7D	Glide-SP	8.48	8.48	10.91
5RFD-T6J	Glide-SP	6.33	8.64	8.09
7B83-PK8	Glide-SP	1.93	1.93	5.83
7AWW-CLU	Glide-SP	5.81	5.81	7.17
7AF0-R9W	Glide-SP	7.61	7.61	8.30
7LME-Y6J	Glide-SP	1.89	5.22	3.60
5RE7-T0S	Glide-SP	9.35	10.65	10.07
5RFB-K3S	Glide-XP	0.93	1.11	1.05
7L14-XFD	Glide-XP	0.54	1.78	0.99
7ABU-R6Q	Glide-XP	10.37	13.47	11.26
7AVD-S1W	Glide-XP	5.37	8.11	6.59
7LFP-XY4	Glide-XP	0.86	1.26	2.09
7L10-XEY	Glide-XP	1.02	2.04	1.65
5RGH-U0M	Glide-XP	4.23	4.23	5.41
7A1U-FUA	Glide-XP	0.98	1.12	1.15
7AQI-QEL	Glide-XP	8.64	9.18	10.99
5REC-T1J	Glide-XP	7.72	7.72	8.51
7P51-5P9	Glide-XP	0.75	0.75	0.75
5RH4-UHG	Glide-XP	2.14	6.93	5.75
7AQE-RV5	Glide-XP	8.03	8.56	8.37
5RE9-LPZ	Glide-XP	6.64	7.23	7.19
5RGJ-U0S	Glide-XP	7.34	7.73	7.48
7M91-YU4	Glide-XP	0.61	0.61	1.04
5RF4-T5Y	Glide-XP	7.84	7.84	7.84
5RH0-UH4	Glide-XP	6.41	6.70	6.58
7AWW-CLU	Glide-XP	11.29	11.88	11.80
7LDX-R9V	Glide-XP	0.52	0.52	4.64
7M8O-YSM	Glide-XP	0.50	1.09	0.80
7LME-Y6J	Glide-XP	0.97	2.48	3.88
7JU7-G65	Glide-XP	2.37	2.67	3.53
7LTJ-YD1	Glide-XP	0.41	0.41	0.98
5R84-GWS	Glide-XP	1.73	1.73	3.00
7S4B-87H	Glide-XP	0.47	0.47	2.67
7AGA-LZE	Glide-XP	9.64	9.66	9.76
5RGZ-UH1	Glide-XP	7.36	7.57	7.47
7AOL-RQH	Glide-XP	5.49	10.87	7.25
7LMD-Y6A	Glide-XP	0.70	0.70	1.17
7M8N-YSP	Glide-XP	4.55	4.63	4.65
7M90-YTS	Glide-XP	0.88	1.23	1.18
7AXM-93J	Glide-XP	4.39	5.24	6.28
5RF7-T67	Glide-XP	0.50	0.50	0.50
5RGS-S7V	Glide-XP	7.23	12.20	10.57
5RGI-U0P	Glide-XP	0.68	0.68	1.82
7AWU-S8B	Glide-XP	8.16	8.16	8.18
5RGW-UGM	Glide-XP	2.58	4.48	3.16
7LDL-XV4	Glide-XP	1.32	1.47	1.71
7M8M-YSG	Glide-XP	0.65	1.06	0.87
7AMJ-RMZ	Glide-XP	4.54	5.66	5.51
7MPB-ASC	Glide-XP	3.61	3.73	3.69
5REE-T1M	Glide-XP	0.46	9.34	5.58
7AP6-RQN	Glide-XP	3.39	7.03	5.08
5RE6-O0S	Glide-XP	6.47	6.47	7.05
7M8X-YTJ	Glide-XP	1.76	2.06	1.90
5RGG-NZD	Glide-XP	4.24	8.26	6.41
5REB-T0Y	Glide-XP	1.73	4.71	2.97
6M2N-3WL	Glide-XP	0.41	0.41	2.37
5RGY-UGS	Glide-XP	8.64	8.87	8.83
5RF3-T5V	Glide-XP	1.25	1.25	4.97
5RH3-UHA	Glide-XP	0.99	0.99	0.99
5R82-RZS	Glide-XP	4.24	4.24	5.57
6YVF-A82	Glide-XP	1.84	2.16	2.78
5REA-JGP	Glide-XP	12.15	13.41	12.99
5RF0-T5D	Glide-XP	0.54	1.36	0.95
6W79-X77	Glide-XP	0.55	0.55	0.69
5RH8-UHM	Glide-XP	1.50	1.86	1.78
7AWR-S7W	Glide-XP	2.55	2.55	4.07
5RHD-US7	Glide-XP	0.63	0.63	0.98
7KVL-X4P	Glide-XP	4.57	4.57	7.20
7LMF-Y6G	Glide-XP	1.07	1.07	1.56
7N44-06I	Glide-XP	0.51	0.95	1.01
5RG1-T9J	Glide-XP	0.39	3.18	2.36
5RF5-HV2	Glide-XP	0.83	1.42	1.44
5RFD-T6J	Glide-XP	5.99	5.99	9.55
5REI-T1S	Glide-XP	5.83	5.83	10.78
5R7Z-HWH	Glide-XP	3.49	3.69	4.28
5RF1-T5G	Glide-XP	0.87	1.32	1.44
7ANS-RNW	Glide-XP	1.49	1.49	2.87
7KX5-X7V	Glide-XP	8.10	8.16	8.17
7LFE-XWS	Glide-XP	2.25	2.25	2.25
5REH-AWP	Glide-XP	7.83	8.17	8.11
5RE5-T0J	Glide-XP	2.38	2.38	4.41
5RGQ-U1V	Glide-XP	4.67	4.67	4.68
7NT3-UQZ	Glide-XP	1.43	1.43	2.44
7NUK-USH	Glide-XP	1.59	1.59	1.97
6W63-X77	Glide-XP	0.93	0.93	4.62
5RGK-U0V	Glide-XP	8.53	9.89	9.27
5RF2-HVB	Glide-XP	0.85	2.56	5.79
7M8Y-YTM	Glide-XP	1.22	1.22	3.55
5RF6-NTG	Glide-XP	2.00	2.00	3.57
7M8P-YSJ	Glide-XP	0.50	0.98	0.79
7L13-XF7	Glide-XP	0.35	0.35	0.76
7L12-XF4	Glide-XP	0.66	0.66	0.82
7CA8-FNO	Glide-XP	3.78	3.78	5.00
5RGX-UGP	Glide-XP	1.33	5.98	4.01
5RH2-UH7	Glide-XP	0.58	0.58	0.58
5R81-RZJ	Glide-XP	1.40	1.52	1.46
7L0D-0EN	Glide-XP	6.03	6.03	6.03
5REG-LWA	Glide-XP	1.40	2.12	1.69
7AXO-QCP	Glide-XP	0.52	0.52	0.82
5R80-RZG	Glide-XP	2.44	2.44	5.36
7KW5-X4Y	Glide-XP	4.94	5.22	5.05
5RE4-SZY	Glide-XP	2.29	2.29	2.35
5REZ-T54	Glide-XP	0.55	0.55	1.23
5RED-JJG	Glide-XP	12.75	12.76	12.83
5R83-K0G	Glide-XP	3.15	6.61	5.41
5RGV-UGG	Glide-XP	0.86	0.86	1.16
5RFE-JGG	Glide-XP	9.28	9.38	9.33
5RF8-SFY	Glide-XP	10.05	10.55	10.48
5RE7-T0S	Glide-XP	9.97	9.97	10.19
5RF9-S7D	Glide-XP	2.03	2.03	6.99
5RE8-T0V	Glide-XP	14.47	14.47	14.84
7B83-PK8	Glide-XP	1.94	1.94	2.85
5RFA-JGY	Glide-XP	0.59	0.59	3.55
5REF-6SU	Glide-XP	1.65	5.44	3.39
5RFC-K1Y	Glide-XP	0.84	4.23	3.40
7L11-XF1	Glide-XP	0.41	0.94	0.68
7M8Z-YTV	Glide-XP	1.12	1.16	1.35
7L5D-XNJ	Glide-XP	1.03	1.03	1.66
7N8C-YD1	Glide-XP	0.67	0.67	0.81
5RGU-UGD	Glide-XP	1.51	8.61	5.96
7S3S-860	Glide-XP	0.69	0.69	1.55
7S3K-Z26	Glide-XP	0.68	0.68	0.68
5RH1-UGV	Glide-XP	2.09	3.62	2.78
7KVR-X4V	Glide-XP	12.31	13.08	12.68
5R7Y-JFM	Glide-XP	1.22	6.43	4.88
7AF0-R9W	Glide-XP	7.74	7.74	8.50
7KVL-X4P	PLANTS-chemplp	6.92	6.92	8.47
7ANS-RNW	PLANTS-chemplp	0.92	0.92	3.95
5RHD-US7	PLANTS-chemplp	0.37	0.37	6.99
6W79-X77	PLANTS-chemplp	0.58	0.58	5.61
5R84-GWS	PLANTS-chemplp	0.76	0.76	4.08
5RGZ-UH1	PLANTS-chemplp	0.38	0.38	4.06
7LMF-Y6G	PLANTS-chemplp	0.64	0.64	3.90
5RGX-UGP	PLANTS-chemplp	0.34	0.34	5.30
7AWR-S7W	PLANTS-chemplp	5.99	5.99	8.02
5RF1-T5G	PLANTS-chemplp	0.55	0.55	4.48
5R7Z-HWH	PLANTS-chemplp	1.52	1.52	4.35
7KVR-X4V	PLANTS-chemplp	9.88	12.59	11.66
5REA-JGP	PLANTS-chemplp	11.50	12.94	12.26
5RH8-UHM	PLANTS-chemplp	5.98	5.98	6.53
5RFE-JGG	PLANTS-chemplp	3.65	5.01	6.37
7KX5-X7V	PLANTS-chemplp	0.89	2.16	4.98
7AOL-RQH	PLANTS-chemplp	10.09	11.00	11.03
5REI-T1S	PLANTS-chemplp	3.17	3.17	7.49
5R83-K0G	PLANTS-chemplp	0.50	0.50	4.26
5RGW-UGM	PLANTS-chemplp	4.35	7.37	7.00
5RF0-T5D	PLANTS-chemplp	1.37	1.37	4.11
5RFB-K3S	PLANTS-chemplp	7.93	12.47	9.95
5REH-AWP	PLANTS-chemplp	5.51	5.51	7.88
5RF5-HV2	PLANTS-chemplp	8.51	11.70	9.56
6YVF-A82	PLANTS-chemplp	1.54	1.54	3.67
7M8N-YSP	PLANTS-chemplp	1.32	5.02	4.28
7L14-XFD	PLANTS-chemplp	0.26	0.26	4.56
5RE4-SZY	PLANTS-chemplp	0.51	0.51	5.43
5RED-JJG	PLANTS-chemplp	5.56	11.01	7.61
7N44-06I	PLANTS-chemplp	1.16	1.16	4.63
7LFE-XWS	PLANTS-chemplp	0.29	8.97	3.98
5RF4-T5Y	PLANTS-chemplp	7.58	10.61	10.82
7M8M-YSG	PLANTS-chemplp	0.31	0.31	5.40
7LTJ-YD1	PLANTS-chemplp	1.60	1.60	3.47
7M8O-YSM	PLANTS-chemplp	0.40	0.40	6.23
5RGV-UGG	PLANTS-chemplp	0.98	0.98	4.47
5RE8-T0V	PLANTS-chemplp	10.07	11.51	11.78
5RFC-K1Y	PLANTS-chemplp	3.28	12.65	6.47
5RF9-S7D	PLANTS-chemplp	1.11	5.91	4.51
5REF-6SU	PLANTS-chemplp	1.69	12.59	6.47
7M91-YU4	PLANTS-chemplp	0.81	0.81	4.43
7LME-Y6J	PLANTS-chemplp	0.31	0.31	4.98
7LDX-R9V	PLANTS-chemplp	0.46	8.12	7.27
5RE7-T0S	PLANTS-chemplp	3.25	3.25	7.30
5RH0-UH4	PLANTS-chemplp	6.35	6.38	6.81
7AWW-CLU	PLANTS-chemplp	6.55	11.70	9.61
5RGU-UGD	PLANTS-chemplp	1.08	1.08	4.99
7AQE-RV5	PLANTS-chemplp	5.86	7.12	7.64
7LFP-XY4	PLANTS-chemplp	1.47	1.47	3.62
7S3K-Z26	PLANTS-chemplp	0.52	0.52	4.72
7L10-XEY	PLANTS-chemplp	0.28	0.28	4.16
7JU7-G65	PLANTS-chemplp	7.99	11.79	9.68
7NT3-UQZ	PLANTS-chemplp	2.19	3.64	3.90
5R81-RZJ	PLANTS-chemplp	1.15	1.15	3.82
7S3S-860	PLANTS-chemplp	0.77	0.77	4.65
5RFA-JGY	PLANTS-chemplp	0.27	6.53	7.49
5RH3-UHA	PLANTS-chemplp	0.54	0.54	4.32
5R7Y-JFM	PLANTS-chemplp	4.61	4.61	6.81
5RF8-SFY	PLANTS-chemplp	10.62	12.30	12.10
5RH2-UH7	PLANTS-chemplp	0.39	0.39	4.98
5RFD-T6J	PLANTS-chemplp	11.05	12.11	12.48
7AMJ-RMZ	PLANTS-chemplp	8.04	10.25	9.68
7S4B-87H	PLANTS-chemplp	1.10	2.53	3.97
7AGA-LZE	PLANTS-chemplp	1.36	8.17	6.56
5RGQ-U1V	PLANTS-chemplp	1.25	4.78	3.34
5R82-RZS	PLANTS-chemplp	0.38	7.46	7.05
7AF0-R9W	PLANTS-chemplp	9.55	10.27	10.20
5REE-T1M	PLANTS-chemplp	0.58	11.32	6.50
6W63-X77	PLANTS-chemplp	0.99	0.99	4.95
5RE6-O0S	PLANTS-chemplp	5.59	6.63	8.15
7L0D-0EN	PLANTS-chemplp	1.25	1.25	5.15
7AQI-QEL	PLANTS-chemplp	4.18	9.29	8.79
5RGY-UGS	PLANTS-chemplp	1.90	2.26	4.41
5RF6-NTG	PLANTS-chemplp	1.52	1.52	4.93
5RGJ-U0S	PLANTS-chemplp	5.08	6.21	7.45
7AP6-RQN	PLANTS-chemplp	3.79	4.92	6.17
7AXO-QCP	PLANTS-chemplp	6.88	6.88	8.53
5RGH-U0M	PLANTS-chemplp	5.69	8.22	7.25
7AWU-S8B	PLANTS-chemplp	6.92	6.92	7.51
7M8Y-YTM	PLANTS-chemplp	1.21	1.21	5.88
7L13-XF7	PLANTS-chemplp	1.17	1.17	5.18
7ABU-R6Q	PLANTS-chemplp	6.04	13.06	10.07
7MPB-ASC	PLANTS-chemplp	1.71	4.11	4.00
5RF7-T67	PLANTS-chemplp	1.34	1.34	4.51
7A1U-FUA	PLANTS-chemplp	5.27	7.61	6.78
5RGI-U0P	PLANTS-chemplp	0.36	0.36	4.48
7L12-XF4	PLANTS-chemplp	0.51	0.51	5.77
5RH1-UGV	PLANTS-chemplp	1.53	8.20	5.36
5RH4-UHG	PLANTS-chemplp	3.48	6.32	6.45
7L5D-XNJ	PLANTS-chemplp	2.21	2.21	8.12
7M90-YTS	PLANTS-chemplp	0.39	0.39	3.82
5REG-LWA	PLANTS-chemplp	1.38	1.99	8.47
7M8P-YSJ	PLANTS-chemplp	0.45	0.45	4.62
5REC-T1J	PLANTS-chemplp	5.32	6.29	6.88
7LDL-XV4	PLANTS-chemplp	0.72	0.72	2.98
7L11-XF1	PLANTS-chemplp	0.25	0.25	5.30
5RE9-LPZ	PLANTS-chemplp	6.37	6.94	7.00
7AVD-S1W	PLANTS-chemplp	5.39	7.31	7.35
7N8C-YD1	PLANTS-chemplp	0.39	0.39	4.25
5RGS-S7V	PLANTS-chemplp	6.46	6.68	8.11
7M8Z-YTV	PLANTS-chemplp	0.72	0.72	4.51
5RF2-HVB	PLANTS-chemplp	2.48	13.08	10.14
5RG1-T9J	PLANTS-chemplp	6.74	6.91	7.05
5REZ-T54	PLANTS-chemplp	1.99	4.82	3.68
5R80-RZG	PLANTS-chemplp	0.51	0.51	3.32
7CA8-FNO	PLANTS-chemplp	4.38	5.89	7.03
5REB-T0Y	PLANTS-chemplp	5.82	7.99	7.45
5RF3-T5V	PLANTS-chemplp	0.61	0.77	3.73
5RE5-T0J	PLANTS-chemplp	2.64	11.37	7.40
7LMD-Y6A	PLANTS-chemplp	0.36	0.36	5.59
7AXM-93J	PLANTS-chemplp	5.83	5.83	8.46
6M2N-3WL	PLANTS-chemplp	1.93	1.93	3.47
7M8X-YTJ	PLANTS-chemplp	0.36	0.36	5.52
7B83-PK8	PLANTS-chemplp	6.37	7.00	7.81
7NUK-USH	PLANTS-chemplp	4.34	7.94	6.83
7KW5-X4Y	PLANTS-chemplp	7.99	9.05	9.61
7P51-5P9	PLANTS-chemplp	0.40	0.40	5.66
5RGK-U0V	PLANTS-chemplp	7.80	7.80	8.75
5RGG-NZD	PLANTS-chemplp	5.14	12.82	10.08
7LFP-XY4	PLANTS-plp	1.65	1.65	5.59
5REZ-T54	PLANTS-plp	1.99	4.21	3.81
5RE4-SZY	PLANTS-plp	1.06	7.41	7.15
5RGI-U0P	PLANTS-plp	0.44	5.85	4.45
7M8N-YSP	PLANTS-plp	1.43	1.43	6.95
5RE9-LPZ	PLANTS-plp	6.39	6.92	7.64
5RGZ-UH1	PLANTS-plp	0.80	0.80	4.36
7AXO-QCP	PLANTS-plp	4.02	6.90	7.80
7M8O-YSM	PLANTS-plp	1.07	1.07	6.39
5RE7-T0S	PLANTS-plp	3.30	3.30	7.40
7LMD-Y6A	PLANTS-plp	1.56	1.56	6.21
5R84-GWS	PLANTS-plp	0.74	0.74	3.98
5RF9-S7D	PLANTS-plp	1.04	5.96	3.86
5R7Y-JFM	PLANTS-plp	0.89	7.41	6.01
7L5D-XNJ	PLANTS-plp	8.54	9.90	9.47
7LME-Y6J	PLANTS-plp	2.11	2.11	5.26
7AOL-RQH	PLANTS-plp	9.78	11.11	10.75
7AXM-93J	PLANTS-plp	2.18	5.85	6.88
7M90-YTS	PLANTS-plp	1.28	1.28	6.40
5R83-K0G	PLANTS-plp	0.51	7.13	6.02
7L0D-0EN	PLANTS-plp	1.18	1.18	5.16
7P51-5P9	PLANTS-plp	0.41	0.41	5.23
5RFE-JGG	PLANTS-plp	5.01	5.01	7.01
5RF7-T67	PLANTS-plp	1.28	1.28	4.49
5R80-RZG	PLANTS-plp	0.50	0.50	4.20
7KW5-X4Y	PLANTS-plp	8.00	9.99	9.61
5RGV-UGG	PLANTS-plp	0.97	3.85	4.61
5RGW-UGM	PLANTS-plp	3.86	7.79	6.48
7AGA-LZE	PLANTS-plp	7.27	8.25	8.34
7KVR-X4V	PLANTS-plp	9.65	9.65	11.53
5RED-JJG	PLANTS-plp	6.20	11.01	7.71
7LTJ-YD1	PLANTS-plp	0.23	0.23	3.19
7JU7-G65	PLANTS-plp	8.96	11.77	10.72
5RF8-SFY	PLANTS-plp	10.68	13.26	12.27
5REG-LWA	PLANTS-plp	2.23	11.28	9.67
7AWU-S8B	PLANTS-plp	7.18	7.93	7.62
5RGS-S7V	PLANTS-plp	6.68	6.68	8.01
5RF5-HV2	PLANTS-plp	2.93	2.93	8.12
7A1U-FUA	PLANTS-plp	3.55	7.53	5.86
5RH0-UH4	PLANTS-plp	6.30	7.36	7.30
6W63-X77	PLANTS-plp	1.24	1.24	5.71
5RGH-U0M	PLANTS-plp	4.50	8.20	6.78
5RGK-U0V	PLANTS-plp	8.15	8.80	8.96
7M8X-YTJ	PLANTS-plp	2.05	2.05	6.26
7N8C-YD1	PLANTS-plp	0.34	0.34	3.68
5RGG-NZD	PLANTS-plp	4.29	12.52	8.63
7NUK-USH	PLANTS-plp	4.69	7.96	6.45
5RE6-O0S	PLANTS-plp	6.14	8.96	8.72
5REB-T0Y	PLANTS-plp	1.59	6.49	5.77
7CA8-FNO	PLANTS-plp	5.53	8.96	7.43
5RFB-K3S	PLANTS-plp	8.04	8.22	10.06
5RF3-T5V	PLANTS-plp	0.90	0.90	4.90
5RGQ-U1V	PLANTS-plp	1.49	3.31	3.72
5RE5-T0J	PLANTS-plp	4.80	8.90	7.56
5RGY-UGS	PLANTS-plp	2.17	2.17	5.75
5RG1-T9J	PLANTS-plp	3.84	6.90	5.89
6M2N-3WL	PLANTS-plp	1.87	1.87	3.88
5REH-AWP	PLANTS-plp	5.66	5.66	7.94
5REE-T1M	PLANTS-plp	5.77	6.43	7.80
7AP6-RQN	PLANTS-plp	4.89	4.89	6.07
5RH1-UGV	PLANTS-plp	1.68	6.65	5.63
7L10-XEY	PLANTS-plp	0.28	0.28	3.78
7L12-XF4	PLANTS-plp	3.18	10.30	8.28
5REC-T1J	PLANTS-plp	6.22	6.22	9.11
7L11-XF1	PLANTS-plp	1.85	5.26	5.75
5RH4-UHG	PLANTS-plp	4.25	6.31	7.34
7AQI-QEL	PLANTS-plp	8.39	9.36	9.68
5RF2-HVB	PLANTS-plp	7.89	8.19	9.42
7ABU-R6Q	PLANTS-plp	3.80	10.05	9.30
7L13-XF7	PLANTS-plp	1.18	1.18	6.98
7M8P-YSJ	PLANTS-plp	0.42	0.42	6.77
7M8Z-YTV	PLANTS-plp	0.72	0.72	6.31
7MPB-ASC	PLANTS-plp	1.52	4.12	3.43
5RF6-NTG	PLANTS-plp	1.54	5.64	5.37
5RGJ-U0S	PLANTS-plp	5.09	6.22	9.10
7M8Y-YTM	PLANTS-plp	1.24	1.24	5.16
7LDL-XV4	PLANTS-plp	1.47	1.47	2.84
5R82-RZS	PLANTS-plp	1.73	4.79	7.41
7LFE-XWS	PLANTS-plp	1.02	9.00	4.14
6YVF-A82	PLANTS-plp	1.78	1.78	3.15
7AMJ-RMZ	PLANTS-plp	7.89	9.39	9.70
5R81-RZJ	PLANTS-plp	1.15	1.15	3.84
5RH3-UHA	PLANTS-plp	0.48	0.48	3.87
5RFC-K1Y	PLANTS-plp	3.28	4.45	6.52
7M8M-YSG	PLANTS-plp	0.49	0.49	5.46
7S4B-87H	PLANTS-plp	1.15	2.92	4.47
5RFA-JGY	PLANTS-plp	2.54	6.54	8.60
5RH2-UH7	PLANTS-plp	0.37	0.37	5.74
5REF-6SU	PLANTS-plp	1.98	12.57	8.00
5RGU-UGD	PLANTS-plp	1.33	1.33	5.29
7M91-YU4	PLANTS-plp	1.41	1.41	5.36
5RE8-T0V	PLANTS-plp	9.15	11.43	11.00
7AWW-CLU	PLANTS-plp	9.95	9.95	11.09
7AQE-RV5	PLANTS-plp	7.82	8.19	8.46
7B83-PK8	PLANTS-plp	5.54	5.54	7.58
7S3S-860	PLANTS-plp	0.81	0.81	5.34
5RF4-T5Y	PLANTS-plp	7.66	11.51	10.41
7N44-06I	PLANTS-plp	1.21	1.21	5.96
7KVL-X4P	PLANTS-plp	6.93	12.11	10.35
5RGX-UGP	PLANTS-plp	0.35	0.35	5.41
7S3K-Z26	PLANTS-plp	1.09	1.09	6.03
7KX5-X7V	PLANTS-plp	0.53	0.53	5.45
5REA-JGP	PLANTS-plp	9.04	11.46	11.40
5RF0-T5D	PLANTS-plp	1.48	2.57	4.19
5REI-T1S	PLANTS-plp	5.49	7.29	7.06
7AF0-R9W	PLANTS-plp	9.55	10.27	10.21
7ANS-RNW	PLANTS-plp	0.92	0.92	5.85
6W79-X77	PLANTS-plp	0.86	0.86	5.60
5RH8-UHM	PLANTS-plp	6.02	6.02	6.64
5R7Z-HWH	PLANTS-plp	1.52	5.50	4.14
5RHD-US7	PLANTS-plp	7.22	11.30	9.20
5RF1-T5G	PLANTS-plp	0.69	2.09	3.03
5RFD-T6J	PLANTS-plp	11.20	13.35	12.53
7AWR-S7W	PLANTS-plp	5.72	5.72	9.32
7LMF-Y6G	PLANTS-plp	1.94	1.94	4.85
7L14-XFD	PLANTS-plp	1.82	1.82	6.12
7NT3-UQZ	PLANTS-plp	2.20	2.20	3.65
7LDX-R9V	PLANTS-plp	7.03	11.52	9.22
7AVD-S1W	PLANTS-plp	5.87	7.28	6.97
